# Supplementary material
Source: PubMed Central journal article supplement (PMC9847135)
Supplement: NIHMS1856582-supplement-GPCR_SI.pdf [file NIHMS1856582-supplement-GPCR_SI.pdf]

## Supporting Information

### Conservation of allosteric ligand binding sites in G-protein coupled receptors

Amanda E. Wakefield<sup>1,2</sup>, Dávid Bajusz<sup>3</sup>, Dima Kozakov<sup>4</sup>, György M Keserű<sup>3\*</sup> and Sandor Vajda<sup>1,2\*</sup>

<sup>1</sup>Department of Chemistry, Boston University, Boston, MA 02215, USA

<sup>2</sup>Department of Biomedical Engineering, Boston University, Boston, MA 02215, USA

<sup>3</sup>Medicinal Chemistry Research Group, Research Center for Natural Sciences, H-1117 Budapest, Hungary

<sup>4</sup>Department of Applied Mathematics and Statistics, Stony Brook University, Stony Brook NY 11794.

Lead contact: Sandor Vajda ([vajda@bu.edu](mailto:vajda@bu.edu)),

**Table S1. RMSD between X-ray structures and AF2 models of the 39 structures with bound allosteric ligands**

| Target           | PDB  | Uniprot | RMSD, Å |
|------------------|------|---------|---------|
| <b>Class A</b>   |      |         |         |
| A <sub>2A</sub>  | 5UIG | P29274  | 0.715   |
| β <sub>2</sub>   | 5X7D | P07550  | 0.396   |
| β <sub>2</sub>   | 6N48 | P07550  | 1.148   |
| β <sub>2</sub>   | 6OBA | P07550  | 0.404   |
| C5a <sub>1</sub> | 5O9H | P21730  | 0.519   |
| C5a <sub>1</sub> | 6C1Q | P21730  | 0.621   |
| C5a <sub>1</sub> | 6C1R | P21730  | 0.593   |
| CCR2             | 5T1A | P41597  | 0.593   |
| CCR5             | 4MBS | P51681  | 0.685   |
| CCR7             | 6QZH | P32248  | 1.492   |
| CCR9             | 5LWE | P51686  | 0.871   |
| CB <sub>1</sub>  | 6KQI | P21554  | 1.472   |
| CXCR4            | 3ODU | P61073  | 0.626   |
| CXCR4            | 3OE0 | P61073  | 0.809   |
| FFA1             | 4PHU | O14842  | 0.672   |

|                  |      |        |       |
|------------------|------|--------|-------|
| FFA1             | 5KW2 | O14842 | 1.249 |
| FFA1             | 5TZR | O14842 | 0.644 |
| FFA1             | 5TZY | O14842 | 0.96  |
| GPR52            | 6LI0 | Q9Y2T5 | 0.654 |
| M <sub>2</sub>   | 4MQT | P08172 | 1.059 |
| P2Y <sub>1</sub> | 4XNV | P47900 | 0.608 |
| PAR2             | 5NDD | P55085 | 0.716 |
| PAR2             | 5NDZ | P55085 | 0.702 |

**Class B**

|                  |      |        |       |
|------------------|------|--------|-------|
| CRF <sub>1</sub> | 4K5Y | P34998 | 1.975 |
| GLP-1            | 5VEW | P43220 | 1.885 |
| GLP-1            | 5VEX | P43220 | 2.193 |
| GLP-1            | 6KJV | P43220 | 2.098 |
| GLP-1            | 6KK7 | P43220 | 2.282 |
| GLP-1            | 6LN2 | P43220 | 2.02  |
| GCGR             | 5EE7 | P47871 | 1.505 |
| GCGR             | 5XEZ | P47871 | 1.923 |

**Class C**

|                   |      |        |       |
|-------------------|------|--------|-------|
| mGlu <sub>1</sub> | 4OR2 | Q13255 | 0.681 |
| mGlu <sub>5</sub> | 4OO9 | P41594 | 0.653 |
| mGlu <sub>5</sub> | 5CGC | P41594 | 0.741 |
| mGlu <sub>5</sub> | 5CGD | P41594 | 0.729 |
| mGlu <sub>5</sub> | 6FFH | P41594 | 0.711 |
| mGlu <sub>5</sub> | 6FFI | P41594 | 0.745 |

**Class F**

|     |      |        |       |
|-----|------|--------|-------|
| SMO | 4N4W | Q99835 | 0.445 |
| SMO | 5L7I | Q99835 | 0.421 |

---

**Average 1.006**

**Table S2. Overlapping probe atoms among the allosteric sites of the 21 GPCR structures with ligand and strong hot spot<sup>a</sup>**

|         | 1   | 2   | 3   | 4   | 5   | 6   | 7   | 8   | 9   | 10  | 11  | 12  | 13  | 14 | 15  | 16  | 17  | 18  | 19  | 20  | 21  |
|---------|-----|-----|-----|-----|-----|-----|-----|-----|-----|-----|-----|-----|-----|----|-----|-----|-----|-----|-----|-----|-----|
| 1. 3ODU | 213 | 172 | 16  | 262 | 107 | 97  | 52  | 92  | 5   | 0   | 18  | 0   | 191 | 0  | 0   | 6   | 0   | 116 | 0   | 88  | 0   |
| 2. 3OE0 | 143 | 279 | 0   | 248 | 93  | 43  | 54  | 101 | 31  | 16  | 66  | 0   | 126 | 0  | 0   | 11  | 16  | 189 | 0   | 95  | 0   |
| 3. 4K5Y | 48  | 24  | 169 | 13  | 0   | 69  | 71  | 65  | 9   | 0   | 1   | 0   | 47  | 12 | 0   | 20  | 0   | 0   | 0   | 35  | 0   |
| 4. 4MBS | 83  | 119 | 14  | 339 | 16  | 107 | 140 | 85  | 17  | 47  | 22  | 0   | 130 | 0  | 0   | 16  | 47  | 47  | 0   | 89  | 0   |
| 5. 4MQT | 162 | 230 | 2   | 181 | 204 | 25  | 25  | 74  | 34  | 0   | 10  | 22  | 67  | 0  | 19  | 31  | 0   | 178 | 15  | 21  | 24  |
| 6. 4N4W | 30  | 197 | 38  | 75  | 56  | 152 | 57  | 31  | 0   | 52  | 212 | 0   | 55  | 6  | 37  | 0   | 51  | 67  | 23  | 16  | 38  |
| 7. 4OO9 | 78  | 84  | 6   | 63  | 30  | 36  | 102 | 122 | 48  | 40  | 2   | 0   | 57  | 11 | 0   | 50  | 18  | 28  | 0   | 0   | 18  |
| 8. 4OR2 | 107 | 150 | 28  | 63  | 23  | 44  | 97  | 191 | 58  | 0   | 34  | 0   | 0   | 6  | 0   | 58  | 0   | 0   | 0   | 44  | 0   |
| 9. 4PHU | 1   | 19  | 0   | 3   | 0   | 0   | 18  | 20  | 104 | 202 | 0   | 0   | 0   | 0  | 0   | 104 | 204 | 0   | 29  | 0   | 4   |
| 10.5KW2 | 0   | 0   | 0   | 0   | 0   | 0   | 0   | 0   | 0   | 296 | 0   | 0   | 0   | 20 | 0   | 0   | 286 | 0   | 0   | 0   | 4   |
| 11.5L7I | 6   | 215 | 0   | 26  | 23  | 99  | 20  | 1   | 0   | 45  | 213 | 8   | 34  | 2  | 0   | 0   | 48  | 25  | 29  | 44  | 46  |
| 12.5LWE | 23  | 68  | 0   | 53  | 21  | 0   | 26  | 16  | 18  | 87  | 10  | 169 | 22  | 0  | 128 | 17  | 85  | 42  | 130 | 23  | 115 |
| 13.5NDD | 62  | 69  | 0   | 81  | 40  | 40  | 0   | 12  | 0   | 50  | 56  | 0   | 97  | 49 | 0   | 0   | 64  | 26  | 0   | 49  | 0   |
| 14.5NDZ | 77  | 54  | 5   | 78  | 33  | 44  | 0   | 6   | 0   | 69  | 53  | 0   | 101 | 70 | 0   | 0   | 69  | 38  | 0   | 54  | 0   |
| 15.5T1A | 100 | 86  | 16  | 157 | 9   | 44  | 43  | 52  | 20  | 55  | 19  | 186 | 96  | 0  | 194 | 24  | 55  | 24  | 178 | 24  | 168 |
| 16.5TZR | 6   | 26  | 0   | 5   | 11  | 8   | 26  | 31  | 149 | 135 | 6   | 0   | 7   | 0  | 0   | 149 | 140 | 13  | 27  | 15  | 0   |
| 17.5TZY | 0   | 46  | 0   | 20  | 18  | 0   | 23  | 25  | 83  | 178 | 6   | 63  | 0   | 0  | 42  | 83  | 178 | 0   | 52  | 0   | 55  |
| 18.5UIG | 143 | 158 | 0   | 122 | 100 | 97  | 19  | 70  | 44  | 0   | 51  | 100 | 118 | 0  | 16  | 38  | 5   | 170 | 56  | 39  | 15  |
| 19.5X7D | 88  | 128 | 3   | 187 | 61  | 115 | 57  | 69  | 20  | 0   | 39  | 133 | 88  | 0  | 123 | 20  | 0   | 124 | 129 | 63  | 128 |
| 20.6LI0 | 47  | 21  | 0   | 33  | 41  | 29  | 0   | 0   | 0   | 163 | 41  | 10  | 52  | 50 | 9   | 0   | 160 | 47  | 7   | 157 | 10  |
| 21.6QZH | 48  | 95  | 10  | 93  | 95  | 14  | 0   | 3   | 0   | 0   | 67  | 170 | 72  | 0  | 143 | 0   | 0   | 79  | 123 | 122 | 180 |

<sup>a</sup> For example, Table S2 shows that the hot spot in 4OO9 (Column 7) overlaps with its own ligand (102 probe atoms) and the ligand in 4OR2 (Column 8, 122 probe atoms).

**Table S3. The 10 proteins with the highest level of hot spot overlap with the allosteric ligand bound to 21 GPCRs with strong hot spots at the ligand binding site. Each of the 21 “parent” structures with the bound ligand is listed in bold.**

| <b>Class</b> | <b>Uniprot</b>     | <b>PDB</b>  | <b>Overlap</b> | <b>Volume<br/>Å<sup>3</sup></b> | <b>RMSD, Å</b> | <b>Sequence<br/>similarity, %</b> | <b>dpocket</b> |
|--------------|--------------------|-------------|----------------|---------------------------------|----------------|-----------------------------------|----------------|
| <b>A</b>     | <b>aa2ar_human</b> | <b>5UIG</b> | <b>170</b>     | <b>344.4</b>                    |                |                                   |                |
| A            | 5ht2b_human        | 6DRZ        | 260            | 366.9                           | 2.7            | 60.6                              | 0.257          |
| A            | agtr1_human        | 4ZUD        | 252            | 511.9                           | 6.4            | 52.0                              | 0.302          |
| A            | 5ht2b_human        | 5TUD        | 241            | 378.4                           | 3.0            | 60.6                              | 0.242          |
| A            | aa2ar_human        | 5WF6        | 235            | 346.6                           | 1.4            | 99.6                              | 0.167          |
| A            | aa2ar_human        | 3QAK        | 231            | 359.9                           | 1.6            | 99.3                              | 0.198          |
| A            | apj_human          | 5VBL        | 231            | 317.5                           | 6.5            | 49.3                              | 0.226          |
| A            | opr_d_human        | 4N6H        | 230            | 273.1                           | 2.7            | 59.0                              | 0.256          |
| A            | 5ht2b_human        | 6DRY        | 222            | 340.5                           | 2.8            | 59.5                              | 0.284          |
| A            | aa2ar_human        | 3VG9        | 219            | 330.5                           | 0.9            | 98.6                              | 0.168          |
| A            | 5ht2c_human        | 6BQG        | 218            | 473.8                           | 2.4            | 61.9                              | 0.245          |
| A            | 5ht2b_human        | 6DRX        | 218            | 459.6                           | 4.3            | 59.8                              | 0.278          |
| <b>A</b>     | <b>adrb2_human</b> | <b>5X7D</b> | <b>129</b>     | <b>69</b>                       |                |                                   |                |
| A            | ccr2_human         | 5T1A        | 178            | 188.1                           | 3.6            | 56.3                              | 0.251          |
| A            | gpr52_human        | 6L11        | 147            | 139.3                           | 1.8            | 55.0                              | 0.257          |
| A            | aa2ar_human        | 3PWH        | 143            | 176.7                           | 1.6            | 57.7                              | 0.264          |
| A            | ccr9_human         | 5LWE        | 130            | 175.8                           | 3.5            | 52.8                              | 0.233          |
| A            | aa2ar_human        | 5OLV        | 121            | 146.5                           | 1.5            | 58.1                              | 0.253          |
| A            | aa2ar_human        | 3UZA        | 119            | 170.2                           | 1.7            | 57.7                              | 0.254          |
| A            | aa2ar_human        | 5OLG        | 114            | 117.1                           | 1.5            | 58.1                              | 0.247          |
| A            | aa2ar_human        | 5IUB        | 108            | 131.7                           | 1.5            | 58.1                              | 0.251          |
| A            | aa1r_human         | 5N2S        | 107            | 95.5                            | 1.8            | 54.5                              | 0.285          |
| A            | adrb2_human        | 2R4R        | 106            | 57.3                            | 0.8            | 91.7                              | 0.176          |
| A            | adrb2_human        | 3KJ6        | 105            | 66.9                            | 0.7            | 92.3                              | 0.194          |
| <b>A</b>     | <b>ccr2_human</b>  | <b>5T1A</b> | <b>194</b>     | <b>235.6</b>                    |                |                                   |                |
| A            | ccr7_human         | 6QZH        | 143            | 156.8                           | 2.0            | 69.4                              | 0.159          |
| A            | gpr52_human        | 6L11        | 137            | 111.4                           | 2.6            | 51.8                              | 0.231          |
| A            | ccr9_human         | 5LWE        | 128            | 196.6                           | 2.4            | 66.1                              | 0.262          |
| A            | adrb2_human        | 5X7D        | 123            | 57.7                            | 3.6            | 56.3                              | 0.180          |
| A            | aa2ar_human        | 5OLV        | 107            | 115.7                           | 3.7            | 52.7                              | 0.359          |
| A            | ednrb_human        | 6IGL        | 103            | 47.2                            | 4.2            | 56.2                              | 0.427          |
| A            | ntr1_rat           | 4BUO        | 102            | 135.2                           | 2.9            | 58.3                              | 0.364          |

|          |                   |             |            |              |     |       |       |
|----------|-------------------|-------------|------------|--------------|-----|-------|-------|
| A        | aa2ar_human       | 5OM4        | 99         | 58.9         | 3.7 | 52.3  | 0.361 |
| A        | aa2ar_human       | 5IUB        | 96         | 114.9        | 3.6 | 52.7  | 0.333 |
| F        | smo_human         | 4QIM        | 94         | 70.8         | 7.1 | 48.8  | 0.332 |
| A        | aa2ar_human       | 5OLZ        | 93         | 103.4        | 3.8 | 52.7  | 0.368 |
| <b>A</b> | <b>ccr5_human</b> | <b>4MBS</b> | <b>339</b> | <b>839.8</b> |     |       |       |
| A        | ccr5_human        | 6AKY        | 384        | 796.0        | 0.4 | 100   | 0.169 |
| A        | ccr5_human        | 6MEO        | 346        | 702.8        | 0.9 | 98.6  | 0.141 |
| A        | ccr5_human        | 6MET        | 340        | 694.9        | 0.9 | 98.6  | 0.140 |
| A        | ccr5_human        | 5UIW        | 339        | 651.9        | 0.7 | 100.0 | 0.161 |
| A        | adrb1_melga       | 2VT4        | 333        | 564.2        | 1.9 | 58.2  | 0.373 |
| A        | ccr2_human        | 6GPX        | 317        | 574.0        | 0.8 | 92.0  | 0.279 |
| B        | glp1r_human       | 6LN2        | 317        | 586.5        | 7.4 | 50.7  | 0.277 |
| A        | ccr5_human        | 6AKX        | 313        | 747.6        | 0.2 | 100.0 | 0.059 |
| A        | 5ht2b_human       | 5TUD        | 299        | 643.1        | 3.6 | 54.1  | 0.212 |
| A        | opr_x_human       | 4EA3        | 294        | 622.3        | 1.8 | 63.3  | 0.229 |
| <b>A</b> | <b>ccr7_human</b> | <b>6QZH</b> | <b>180</b> | <b>300</b>   |     |       |       |
| A        | ccr2_human        | 5T1A        | 168        | 183.9        | 2.0 | 69.4  | 0.212 |
| A        | gpr52_human       | 6LI1        | 141        | 130.9        | 4.9 | 52.6  | 0.247 |
| A        | adrb2_human       | 5X7D        | 128        | 132.9        | 4.4 | 51.9  | 0.180 |
| A        | adrb2_human       | 6OBA        | 116        | 180.5        | 2.3 | 53.0  | 0.235 |
| A        | ccr9_human        | 5LWE        | 115        | 153.6        | 2.4 | 65.7  | 0.245 |
| A        | ntr1_rat          | 4BUO        | 110        | 181.1        | 3.7 | 57.5  | 0.227 |
| A        | ednrb_human       | 6IGL        | 107        | 50.2         | 3.9 | 57.8  | 0.415 |
| A        | ntr1_rat          | 3ZEV        | 97         | 199.7        | 3.0 | 57.5  | 0.249 |
| A        | adrb1_melga       | 2YCY        | 86         | 76.9         | 3.6 | 53.7  | 0.247 |
| F        | smo_human         | 4QIM        | 83         | 63.6         | 7.6 | 50.4  | 0.226 |
| A        | adrb2_human       | 3NY9        | 83         | 59.6         | 4.5 | 53.4  | 0.355 |
| <b>A</b> | <b>ccr9_human</b> | <b>5LWE</b> | <b>169</b> | <b>277.5</b> |     |       |       |
| A        | ccr2_human        | 5T1A        | 186        | 205.9        | 2.4 | 66.1  | 0.292 |
| A        | ccr7_human        | 6QZH        | 170        | 265.0        | 2.4 | 65.7  | 0.199 |
| A        | gpr52_human       | 6LI1        | 139        | 116.4        | 3.4 | 49.8  | 0.298 |
| A        | aa2ar_human       | 5OM4        | 137        | 114.8        | 4.8 | 52.0  | 0.245 |
| A        | lpar1_human       | 4Z36        | 134        | 240.6        | 6.9 | 51.7  | 0.171 |
| A        | adrb2_human       | 5X7D        | 133        | 105.7        | 3.5 | 52.8  | 0.268 |
| A        | ntr1_rat          | 3ZEV        | 129        | 211.7        | 4.5 | 57.6  | 0.300 |
| A        | aa2ar_human       | 5OLV        | 129        | 95.1         | 4.8 | 51.7  | 0.249 |
| A        | ntr1_rat          | 4BUO        | 126        | 265          | 6.3 | 57.6  | 0.253 |
| A        | aa2ar_human       | 5IUA        | 122        | 94.2         | 4.3 | 51.3  | 0.255 |

|          |                    |             |            |               |     |      |       |
|----------|--------------------|-------------|------------|---------------|-----|------|-------|
| A        | aa2ar_human        | 5OLH        | 122        | 102.7         | 4.3 | 51.7 | 0.230 |
| <b>A</b> | <b>cxcr4_human</b> | <b>3ODU</b> | <b>213</b> | <b>403.5</b>  |     |      |       |
| A        | pd2r2_human        | 6D26        | 329        | 380.2         | 1.8 | 57.4 | 0.368 |
| A        | pd2r2_human        | 6D27        | 286        | 409.4         | 1.8 | 56.0 | 0.409 |
| A        | aa2ar_human        | 3REY        | 253        | 362.7         | 5.7 | 52.3 | 0.465 |
| A        | ox1r_human         | 4ZJ8        | 248        | 416.8         | 2.6 | 58.8 | 0.159 |
| A        | aa2ar_human        | 3VG9        | 226        | 266.5         | 5.7 | 49.8 | 0.406 |
| A        | acm2_human         | 6OIK        | 222        | 231.4         | 6.6 | 51.3 | 0.576 |
| A        | ox2r_human         | 5WS3        | 217        | 436.8         | 2.1 | 57.8 | 0.232 |
| A        | aa1r_human         | 5UEN        | 214        | 345.7         | 4.6 | 50.5 | 0.350 |
| A        | cxcr4_human        | 3OE8        | 211        | 353.5         | 0.6 | 99.3 | 0.170 |
| A        | ox1r_human         | 4ZJC        | 209        | 472.5         | 2.5 | 58.8 | 0.219 |
| A        | drd4_human         | 5WIU        | 200        | 302.1         | 7.2 | 51.5 | 0.272 |
| <b>A</b> | <b>cxcr4_human</b> | <b>3OE0</b> | <b>279</b> | <b>1149.8</b> |     |      |       |
| A        | ntr1_rat           | 4XEE        | 318        | 634.3         | 4.0 | 55.3 | 0.422 |
| A        | apj_human          | 5VBL        | 312        | 876.2         | 1.3 | 60.8 | 0.340 |
| A        | ntr1_rat           | 4XES        | 299        | 566.4         | 4.2 | 55.7 | 0.362 |
| A        | ntr1_rat           | 4GRV        | 299        | 660.4         | 3.7 | 54.9 | 0.408 |
| A        | lpar1_human        | 4Z34        | 292        | 475           | 6.1 | 51.3 | 0.433 |
| A        | adrb1_melga        | 2YCZ        | 290        | 687.8         | 5.3 | 50.5 | 0.441 |
| A        | adrb1_melga        | 2Y03        | 286        | 596.6         | 3.3 | 50.5 | 0.429 |
| A        | lpar1_human        | 4Z36        | 280        | 486.1         | 6.2 | 47.6 | 0.423 |
| A        | adrb1_melga        | 2Y02        | 279        | 670.7         | 4.4 | 50.9 | 0.458 |
| A        | aa2ar_human        | 5WF6        | 276        | 462.5         | 5.7 | 48.7 | 0.490 |
| A        | adrb2_human        | 2RH1        | 275        | 758.9         | 4.7 | 53.8 | 0.416 |
| A        | adrb1_melga        | 2Y00        | 271        | 650.7         | 5.5 | 50.9 | 0.564 |
| A        | adrb1_melga        | 3ZPQ        | 271        | 610.1         | 5.6 | 50.9 | 0.548 |
| <b>A</b> | <b>par2_human</b>  | <b>5NDD</b> | <b>97</b>  | <b>119.8</b>  |     |      |       |
| A        | cxcr4_human        | 3OE8        | 251        | 278.7         | 2.4 | 60.1 | 0.401 |
| A        | cxcr4_human        | 3OE9        | 222        | 283.8         | 2.6 | 58.6 | 0.356 |
| A        | ccr2_human         | 6GPX        | 221        | 206.1         | 2.2 | 59.9 | 0.236 |
| A        | cxcr4_human        | 3OE6        | 217        | 200.8         | 3.9 | 60.4 | 0.375 |
| A        | pd2r2_human        | 6D26        | 217        | 228.8         | 2.3 | 58.0 | 0.222 |
| A        | aa2ar_human        | 3VG9        | 210        | 176.1         | 5.1 | 51.2 | 0.245 |
| A        | agtr1_human        | 4YAY        | 198        | 212.0         | 3.1 | 59.4 | 0.201 |
| A        | cxcr4_human        | 3ODU        | 191        | 212.3         | 3.9 | 58.1 | 0.280 |
| A        | ox1r_human         | 4ZJ8        | 190        | 163.1         | 4.3 | 56.6 | 0.238 |
| A        | adrb1_melga        | 2VT4        | 189        | 201.9         | 5.0 | 53.2 | 0.385 |

|          |                    |             |            |              |     |      |       |
|----------|--------------------|-------------|------------|--------------|-----|------|-------|
| A        | pd2r2_human        | 6D27        | 184        | 243.2        | 2.4 | 58   | 0.214 |
| <b>A</b> | <b>par2_human</b>  | <b>5NDZ</b> | <b>70</b>  | <b>26.1</b>  |     |      |       |
| A        | par1_human         | 3VW7        | 95         | 49.1         | 1.0 | 67.7 | 0.140 |
| A        | p2ry1_human        | 4XNW        | 81         | 31           | 2.1 | 59.9 | 0.113 |
| A        | pe2r3_human        | 6AK3        | 79         | 87           | 5.2 | 56.4 | 0.225 |
| A        | gpr52_human        | 6LI2        | 67         | 32.3         | 5.6 | 47.7 | 0.291 |
| A        | opsd_bovin         | 2I37        | 65         | 36.4         | 4.6 | 52.2 | 0.393 |
| A        | opsd_bovin         | 2I36        | 53         | 9.0          | 4.2 | 52.5 | 0.288 |
| A        | par2_human         | 5NJ6        | 51         | 16.5         | 0.2 | 100  | 0.138 |
| A        | pe2r4_human        | 5YWY        | 50         | 13.2         | 4.5 | 50.7 | 0.155 |
| A        | gpr52_human        | 6LI0        | 50         | 14.8         | 5.2 | 48.4 | 0.380 |
| A        | adrb2_human        | 3KJ6        | 49         | 10.0         | 4.7 | 53.6 | 0.293 |
| A        | par2_human         | 5NDD        | 49         | 21.8         | 0.2 | 100  | 0.082 |
| <b>A</b> | <b>ffar1_human</b> | <b>4PHU</b> | <b>104</b> | <b>178.4</b> |     |      |       |
| A        | ffar1_human        | 5TZR        | 149        | 246.3        | 0.2 | 99.6 | 0.073 |
| A        | adrb2_human        | 3SN6        | 129        | 98.3         | 3.7 | 45.9 | 0.337 |
| A        | lpar1_human        | 4Z34        | 110        | 190.2        | 4.2 | 42.2 | 0.343 |
| B        | glp1r_human        | 5VEX        | 110        | 139.0        | 7.4 | 46.9 | 0.263 |
| A        | cxcr4_human        | 3OE6        | 100        | 65.4         | 4.6 | 48.8 | 0.344 |
| B        | pth1r_human        | 6FJ3        | 95         | 73.7         | 5.6 | 47.4 | 0.247 |
| A        | lpar1_human        | 4Z35        | 90         | 197.0        | 3.8 | 42.2 | 0.369 |
| A        | lpar1_human        | 4Z36        | 84         | 152.2        | 4.1 | 45.6 | 0.320 |
| A        | ffar1_human        | 5TZY        | 83         | 98.4         | 1.0 | 98.1 | 0.240 |
| A        | acm2_human         | 5ZKC        | 80         | 46.6         | 3.1 | 50.0 | 0.380 |
| <b>A</b> | <b>ffar1_human</b> | <b>5KW2</b> | <b>296</b> | <b>407.2</b> |     |      |       |
| A        | ffar1_human        | 4PHU        | 202        | 236          | 1.2 | 96.8 | 0.208 |
| A        | gpr52_human        | 6LI1        | 183        | 246.9        | 3.7 | 47.4 | 0.412 |
| A        | ffar1_human        | 5TZY        | 178        | 253.3        | 1.1 | 99.6 | 0.132 |
| A        | gpr52_human        | 6LI0        | 163        | 247.5        | 3.9 | 51.4 | 0.388 |
| A        | gpr52_human        | 6LI2        | 161        | 252.0        | 3.4 | 48.6 | 0.319 |
| A        | p2y12_human        | 4PXZ        | 160        | 212.3        | 3.6 | 49.0 | 0.319 |
| A        | hrh1_human         | 3RZE        | 156        | 125.4        | 3.3 | 49.4 | 0.284 |
| A        | aa2ar_human        | 3VGA        | 144        | 175.7        | 3.2 | 54.7 | 0.249 |
| A        | p2y12_human        | 4PY0        | 138        | 97.1         | 3.6 | 49.0 | 0.324 |
| A        | ffar1_human        | 5TZR        | 135        | 80.3         | 1.2 | 96.8 | 0.218 |
| <b>A</b> | <b>ffar1_human</b> | <b>5TZR</b> | <b>149</b> | <b>242.2</b> |     |      |       |
| B        | glr_human          | 5XF1        | 124        | 61.5         | 6.4 | 49.5 | 0.442 |

|          |                    |             |            |              |     |      |       |
|----------|--------------------|-------------|------------|--------------|-----|------|-------|
| A        | adrb2_human        | 3SN6        | 119        | 83.9         | 5.0 | 46.2 | 0.538 |
| B        | glp1r_human        | 5VEX        | 115        | 188.1        | 6.9 | 46.6 | 0.322 |
| A        | lpar1_human        | 4Z34        | 107        | 154.7        | 4.1 | 41.8 | 0.357 |
| A        | ffar1_human        | 4PHU        | 104        | 172.5        | 0.2 | 99.6 | 0.142 |
| A        | cxcr4_human        | 3OE6        | 99         | 62.7         | 4.6 | 48.5 | 0.408 |
| A        | ptafr_human        | 5ZKP        | 93         | 139.5        | 3.3 | 49.8 | 0.374 |
| A        | lpar1_human        | 4Z35        | 90         | 198.8        | 3.6 | 41.4 | 0.442 |
| A        | lpar1_human        | 4Z36        | 89         | 169.9        | 4.3 | 45.4 | 0.383 |
| A        | ffar1_human        | 5TZY        | 83         | 98.4         | 1.0 | 97.1 | 0.285 |
| B        | pth1r_human        | 6FJ3        | 78         | 55.5         | 6.3 | 48.2 | 0.362 |
| <b>A</b> | <b>ffar1_human</b> | <b>5TZY</b> | <b>178</b> | <b>253.3</b> |     |      |       |
| A        | ffar1_human        | 5KW2        | 286        | 399.1        | 1.1 | 99.6 | 0.144 |
| A        | ffar1_human        | 4PHU        | 204        | 249.7        | 1.0 | 98.1 | 0.237 |
| A        | gpr52_human        | 6LI1        | 176        | 231.1        | 4.2 | 45.3 | 0.292 |
| A        | p2y12_human        | 4PXZ        | 166        | 250.3        | 4.8 | 47.4 | 0.278 |
| A        | gpr52_human        | 6LI2        | 162        | 228.9        | 4.8 | 44.2 | 0.319 |
| A        | gpr52_human        | 6LI0        | 160        | 242.7        | 5.7 | 47.1 | 0.295 |
| A        | p2y12_human        | 4PY0        | 144        | 100          | 4.8 | 47.1 | 0.212 |
| A        | ffar1_human        | 5TZR        | 140        | 97.7         | 1.0 | 97.1 | 0.238 |
| A        | hrh1_human         | 3RZE        | 132        | 84.4         | 2.8 | 48.1 | 0.302 |
| A        | aa2ar_human        | 3VGA        | 127        | 137.4        | 4.6 | 50.4 | 0.207 |
| <b>A</b> | <b>gpr52_human</b> | <b>6LI0</b> | <b>157</b> | <b>473.9</b> |     |      |       |
| A        | agtr1_human        | 4YAY        | 264        | 304.9        | 5.3 | 51.6 | 0.301 |
| A        | agtr1_human        | 4ZUD        | 205        | 194.2        | 4.1 | 51.3 | 0.316 |
| A        | q80km9_hcmv        | 5WB1        | 164        | 276.5        | 4.9 | 53.4 | 0.438 |
| A        | agtr2_human        | 5UNG        | 162        | 183          | 5.9 | 54.1 | 0.447 |
| A        | ccr2_human         | 6GPX        | 158        | 215          | 2.5 | 54.2 | 0.525 |
| A        | apj_human          | 5VBL        | 155        | 161.1        | 6.0 | 49.1 | 0.438 |
| A        | ccr2_human         | 6GPS        | 140        | 248.6        | 5.0 | 51.8 | 0.419 |
| A        | pe2r3_human        | 6M9T        | 132        | 90.5         | 3.7 | 45.8 | 0.447 |
| A        | ntr1_rat           | 5T04        | 127        | 147.5        | 4.7 | 48.0 | 0.492 |
| A        | ntr1_rat           | 4XEE        | 126        | 84.2         | 5.2 | 47.3 | 0.422 |
| A        | agtr2_human        | 5UNF        | 125        | 150.6        | 5.7 | 52.0 | 0.531 |
| B        | glr_human          | 5XEZ        | 125        | 210.3        | 5.0 | 44.1 | 0.554 |
| <b>A</b> | <b>acm2_human</b>  | <b>4MQT</b> | <b>204</b> | <b>275.3</b> |     |      |       |
| A        | p2ry1_human        | 4XNV        | 217        | 314.2        | 4.1 | 49.8 | 0.307 |
| A        | acm2_human         | 6OIK        | 216        | 298.2        | 0.8 | 99.6 | 0.152 |
| A        | ntr1_rat           | 4XES        | 204        | 299.5        | 3.1 | 56.7 | 0.205 |



|   |             |      |     |       |     |      |       |
|---|-------------|------|-----|-------|-----|------|-------|
| A | ntr1_rat    | 5T04 | 195 | 430.4 | 2.5 | 55.6 | 0.168 |
| A | ntr1_rat    | 4XEE | 178 | 322.6 | 3.6 | 55.3 | 0.195 |
| A | ntr1_rat    | 4GRV | 174 | 273.8 | 2.9 | 53.5 | 0.228 |
| A | apj_human   | 5VBL | 165 | 304.9 | 3.6 | 54.5 | 0.295 |
| A | ntr1_rat    | 4BUO | 162 | 330.5 | 2.4 | 56.4 | 0.234 |
| A | ntr1_rat    | 3ZEV | 161 | 312.3 | 2.8 | 56.7 | 0.183 |
| F | smo_human   | 4O9R | 160 | 324.3 | 5.1 | 49.5 | 0.214 |
| A | ntr1_rat    | 4BV0 | 157 | 243.1 | 4.6 | 57.5 | 0.205 |
| A | cxcr4_human | 3OE8 | 155 | 321   | 5.9 | 51.7 | 0.314 |
| F | smo_human   | 4QIN | 154 | 204.7 | 3.9 | 49.5 | 0.218 |

|          |                    |             |            |              |     |       |       |
|----------|--------------------|-------------|------------|--------------|-----|-------|-------|
| <b>B</b> | <b>crfr1_human</b> | <b>4K5Y</b> | <b>169</b> | <b>325.2</b> |     |       |       |
| B        | glr_human          | 5YQZ        | 147        | 121.6        | 3.3 | 64.4  | 0.254 |
| B        | crfr1_human        | 4Z9G        | 113        | 247.3        | 0.8 | 100.0 | 0.090 |
| A        | cxcr4_human        | 3OE9        | 103        | 152.2        | 6.0 | 53.4  | 0.219 |
| B        | glp1r_human        | 5NX2        | 89         | 113.7        | 4.2 | 63.6  | 0.233 |
| A        | opsd_bovin         | 6FKA        | 85         | 49.5         | 5.1 | 50.6  | 0.239 |
| A        | opsd_bovin         | 6FKC        | 70         | 27.3         | 4.9 | 50.6  | 0.240 |
| A        | opsd_bovin         | 6FK6        | 63         | 36.6         | 5.1 | 50.6  | 0.300 |
| A        | opsd_bovin         | 6FK8        | 57         | 21           | 5.0 | 50.6  | 0.258 |
| A        | drd2_human         | 6CM4        | 56         | 111.7        | 5.4 | 49.4  | 0.277 |
| A        | opsd_bovin         | 6FK7        | 53         | 20.6         | 5.1 | 50.6  | 0.233 |

|          |                   |             |            |            |     |      |       |
|----------|-------------------|-------------|------------|------------|-----|------|-------|
| <b>C</b> | <b>grm1_human</b> | <b>4OR2</b> | <b>191</b> | <b>411</b> |     |      |       |
| B        | pth1r_human       | 6FJ3        | 263        | 368        | 5.6 | 46.6 | 0.237 |
| A        | acm2_human        | 5ZK8        | 262        | 381        | 4.9 | 43.9 | 0.205 |
| A        | opsd_bovin        | 5TE5        | 243        | 238.9      | 6.8 | 50.2 | 0.292 |
| A        | acm3_rat          | 5ZHP        | 224        | 330.5      | 7.4 | 47.5 | 0.154 |
| A        | oprdr_human       | 4N6H        | 202        | 185        | 6.3 | 48.2 | 0.276 |
| A        | oprdr_human       | 4RWA        | 200        | 246.2      | 5.7 | 47.5 | 0.241 |
| A        | acm3_rat          | 4U14        | 198        | 338.2      | 5.7 | 47.5 | 0.206 |
| A        | opsd_bovin        | 6FK6        | 198        | 475        | 6.3 | 49.8 | 0.263 |
| A        | oprdr_mouse       | 4EJ4        | 191        | 201.4      | 5.4 | 47.1 | 0.200 |
| A        | ox1r_human        | 4ZJC        | 191        | 313.8      | 6.2 | 52.9 | 0.214 |
| A        | acm2_human        | 5ZKC        | 191        | 266.7      | 5.2 | 46.7 | 0.162 |

|          |                   |             |            |              |     |      |       |
|----------|-------------------|-------------|------------|--------------|-----|------|-------|
| <b>C</b> | <b>grm5_human</b> | <b>4O09</b> | <b>102</b> | <b>250.2</b> |     |      |       |
| C        | gabr2_human       | 7C7Q        | 230        | 464.7        | 3.9 | 58.4 | 0.187 |
| A        | oprdr_mouse       | 6DDE        | 228        | 192.9        | 7.0 | 50.6 | 0.232 |
| A        | oprdr_mouse       | 6DDF        | 226        | 259.6        | 7.7 | 50.6 | 0.135 |
| A        | oprdr_mouse       | 4EJ4        | 224        | 180.3        | 6.5 | 48.2 | 0.133 |

|   |               |      |     |       |      |      |       |
|---|---------------|------|-----|-------|------|------|-------|
| A | oprm_mouse    | 4DKL | 218 | 294   | 5.8  | 51   | 0.184 |
| B | g1sgd4_rabbit | 5VAI | 217 | 279.3 | 9.0  | 46.5 | 0.365 |
| B | pth1r_human   | 6FJ3 | 216 | 204.5 | 5.6  | 43.3 | 0.245 |
| A | oprd_human    | 4N6H | 213 | 164.2 | 6.8  | 49.0 | 0.163 |
| A | lpar1_human   | 4Z36 | 206 | 231.6 | 10.4 | 49.8 | 0.180 |
| A | acm2_human    | 5ZKC | 203 | 279.2 | 6.5  | 47.8 | 0.175 |
| B | glp1r_human   | 6B3J | 200 | 186   | 10.3 | 46.9 | 0.310 |
| A | oprd_human    | 4RWA | 194 | 127.6 | 5.6  | 49.8 | 0.148 |
| C | gabr2_human   | 6UO8 | 190 | 371.9 | 3.6  | 57.6 | 0.360 |

|          |                  |             |            |              |     |      |       |
|----------|------------------|-------------|------------|--------------|-----|------|-------|
| <b>F</b> | <b>smo_human</b> | <b>4N4W</b> | <b>152</b> | <b>273.5</b> |     |      |       |
| A        | drd2_human       | 6CM4        | 220        | 393.8        | 5.1 | 49.8 | 0.312 |
| A        | agtr1_human      | 4YAY        | 203        | 359.4        | 7.3 | 46.9 | 0.324 |
| F        | fzd4_human       | 6BD4        | 197        | 309.4        | 1.3 | 58.8 | 0.263 |
| A        | opsd_bovin       | 5TE5        | 195        | 189.5        | 4.6 | 45.4 | 0.487 |
| A        | 5ht2b_human      | 5TUD        | 188        | 335.8        | 8.3 | 53.4 | 0.244 |
| A        | lpar1_human      | 4Z34        | 186        | 345.6        | 6.3 | 50.7 | 0.274 |
| A        | lpar1_human      | 4Z35        | 181        | 291.3        | 6.2 | 51.2 | 0.350 |
| A        | lpar1_human      | 4Z36        | 180        | 305.2        | 6.3 | 52.2 | 0.298 |
| A        | opsd_bovin       | 6FKA        | 179        | 661.9        | 4.8 | 53.7 | 0.347 |
| A        | acm3_rat         | 4DAJ        | 179        | 239.8        | 5.6 | 48.2 | 0.218 |
| A        | opsd_bovin       | 6FK6        | 172        | 663.2        | 4.4 | 48.2 | 0.376 |
| A        | opsd_bovin       | 6FK7        | 169        | 607.4        | 5.2 | 48.2 | 0.455 |

|          |                  |             |            |              |     |      |       |
|----------|------------------|-------------|------------|--------------|-----|------|-------|
| <b>F</b> | <b>smo_human</b> | <b>5L7I</b> | <b>213</b> | <b>530.1</b> |     |      |       |
| F        | smo_human        | 4QIN        | 243        | 367.3        | 0.6 | 98.8 | 0.147 |
| F        | smo_human        | 4O9R        | 234        | 475.8        | 0.7 | 98.8 | 0.163 |
| F        | smo_human        | 5V56        | 217        | 445.8        | 1.1 | 99.4 | 0.144 |
| F        | smo_human        | 4JKV        | 215        | 412.2        | 0.6 | 98.1 | 0.117 |
| F        | smo_human        | 4N4W        | 212        | 487.7        | 0.5 | 98.8 | 0.080 |
| F        | smo_human        | 5V57        | 212        | 435.2        | 1.1 | 98.4 | 0.110 |
| F        | smo_human        | 5L7D        | 184        | 374.9        | 1.9 | 96.4 | 0.123 |
| A        | aa2ar_human      | 3QAK        | 166        | 257.4        | 4.6 | 48.2 | 0.280 |
| F        | smo_human        | 4QIM        | 162        | 339.2        | 0.7 | 99.7 | 0.120 |
| F        | fzd4_human       | 6BD4        | 160        | 393.5        | 1.0 | 56.2 | 0.313 |
| A        | p2ry1_human      | 4XNV        | 149        | 413.7        | 5.9 | 46.2 | 0.415 |

---

**Table S4. “Parent” structures without strong hot spots at the allosteric site**

| PDB ID | Number of “daughter” structures |
|--------|---------------------------------|
| 4XNV   | max 53 <sup>a</sup>             |
| 5CGC   | 126 > 84 <sup>b</sup>           |
| 5CGD   | 109 > 84                        |
| 5EE7   | max 40                          |
| 5O9H   | 16 > 84                         |
| 5VEW   | max 73                          |
| 5VEX   | max 72                          |
| 5XEZ   | max 70                          |
| 6C1Q   | 19 > 84                         |
| 6C1R   | 9 > 84                          |
| 6FFH   | 91 > 84                         |
| 6FFI   | 78 > 84                         |
| 6KJV   | max 77                          |
| 6KK7   | max 73                          |
| 6KQI   | 1 > 84                          |
| 6LN2   | 95 > 84                         |
| 6N48   | max 80                          |
| 6OBA   | 11 > 84                         |

<sup>a</sup> Indicates that the strongest hot spot in any structure at the location of the ligand in 4XNV jaf only 53 probes. Similar notation is used for other structures with no corresponding hot spots.

<sup>b</sup> Indicates that strong hot spot with more than 84 probes at the location of ligand in 5CGC has been found in 126 structures. Similar notation is used to indicate the number of “daughter” structures with more than 84 probes.

**Table S5. “Parent” and “daughter” structures for validation by docking**

| <b>Allosteric<br/>“parent”</b> | <b>“Daughter”<br/>PDB</b> | <b>Probe<br/>overlap</b> | <b>Family</b> |
|--------------------------------|---------------------------|--------------------------|---------------|
| 4OR2                           | 1F88                      | 103                      | Opsins        |
| 4OR2                           | 1GZM                      | 127                      | Opsins        |
| 4OR2                           | 1HZX                      | 107                      | Opsins        |
| 4N4W                           | 1L9H                      | 90                       | Opsins        |
| 4OR2                           | 1U19                      | 125                      | Opsins        |
| 4OR2                           | 2G87                      | 124                      | Opsins        |
| 4OR2                           | 2HPY                      | 189                      | Opsins        |
| 4OR2                           | 2I35                      | 178                      | Opsins        |
| 4MBS                           | 2I36                      | 190                      | Opsins        |
| 4OR2                           | 2I37                      | 101                      | Opsins        |
| 4OO9                           | 2J4Y                      | 160                      | Opsins        |
| 4OR2                           | 2PED                      | 149                      | Opsins        |
| 4MBS                           | 2VT4                      | 333                      | Adrenoceptors |
| 4MBS                           | 2X72                      | 224                      | Opsins        |
| 3OE0                           | 2Y00                      | 271                      | Adrenoceptors |
| 3OE0                           | 2Y01                      | 254                      | Adrenoceptors |
| 3OE0                           | 2Y02                      | 279                      | Adrenoceptors |
| 3OE0                           | 2Y03                      | 286                      | Adrenoceptors |
| 3OE0                           | 2Y04                      | 264                      | Adrenoceptors |
| 3OE0                           | 2YCW                      | 230                      | Adrenoceptors |
| 4MBS                           | 2YCX                      | 283                      | Adrenoceptors |
| 4MBS                           | 2YCY                      | 257                      | Adrenoceptors |
| 3OE0                           | 2YCZ                      | 290                      | Adrenoceptors |
| 4MBS                           | 2Z73                      | 114                      | Opsins        |
| 4MBS                           | 2Z1Y                      | 236                      | Opsins        |
| 4MBS                           | 3AYM                      | 161                      | Opsins        |
| 4MBS                           | 3AYN                      | 137                      | Opsins        |
| 4OR2                           | 3C9L                      | 137                      | Opsins        |
| 4OR2                           | 3C9M                      | 158                      | Opsins        |
| 4MBS                           | 3CAP                      | 108                      | Opsins        |

|      |      |     |                            |
|------|------|-----|----------------------------|
| 4MBS | 3DQB | 130 | Opsins                     |
| 4OR2 | 3OAX | 103 | Opsins                     |
| 5NDD | 3OE9 | 222 | Chemokine                  |
| 4MBS | 3PBL | 225 | Dopamine                   |
| 4MBS | 3PQR | 187 | Opsins                     |
| 5X7D | 3PWH | 143 | Adenosine                  |
| 4MBS | 3PXO | 158 | Opsins                     |
| 5KW2 | 3RZE | 156 | Histamine                  |
| 5UIG | 3V2W | 109 | Lysophospholipid (S1P)     |
| 3OE0 | 3V2Y | 113 | Lysophospholipid (S1P)     |
| 3OE0 | 3VW7 | 237 | Proteinase-activated       |
| 3OE0 | 3ZEV | 164 | Neurotensin                |
| 3OE0 | 3ZPQ | 271 | Adrenoceptors              |
| 3OE0 | 3ZPR | 247 | Adrenoceptors              |
| 4MBS | 4A4M | 192 | Opsins                     |
| 4MBS | 4AMI | 243 | Adrenoceptors              |
| 3OE0 | 4AMJ | 259 | Adrenoceptors              |
| 4MBS | 4BEY | 195 | Opsins                     |
| 4MBS | 4BEZ | 206 | Opsins                     |
| 4MQT | 4BUO | 162 | Neurotensin                |
| 3OE0 | 4BV0 | 189 | Neurotensin                |
| 3OE0 | 4BVN | 221 | Adrenoceptors              |
| 3OE0 | 4BWB | 196 | Neurotensin                |
| 4MBS | 4DAJ | 253 | Acetylcholine (muscarinic) |
| 4MBS | 4DJH | 182 | Opioid                     |
| 4OO9 | 4DKL | 218 | Opioid                     |
| 4MBS | 4EA3 | 294 | Opioid                     |
| 4OO9 | 4EJ4 | 224 | Opioid                     |
| 5UIG | 4GPO | 173 | Adrenoceptors              |
| 3OE0 | 4GRV | 299 | Neurotensin                |
| 4MBS | 4IAQ | 198 | 5-Hydroxytryptamine        |
| 3OE0 | 4IB4 | 220 | 5-Hydroxytryptamine        |
| 4MBS | 4J4Q | 201 | Opsins                     |

|      |      |     |                            |
|------|------|-----|----------------------------|
| 3OEO | 4L6R | 215 | Glucagon                   |
| 4MBS | 4N6H | 251 | Opioid                     |
| 4MBS | 4NC3 | 274 | 5-Hydroxytryptamine        |
| 4OR2 | 4NTJ | 107 | P2Y                        |
| 4MBS | 4PXF | 169 | Opsins                     |
| 5TZY | 4PYO | 144 | P2Y                        |
| 4MBS | 4RWA | 211 | Opioid                     |
| 4MBS | 4RWD | 271 | Opioid                     |
| 4MBS | 4S0V | 256 | Orexin                     |
| 4MBS | 4U14 | 252 | Acetylcholine (muscarinic) |
| 4MBS | 4U15 | 233 | Acetylcholine (muscarinic) |
| 4MBS | 4U16 | 196 | Acetylcholine (muscarinic) |
| 4MBS | 4X1H | 195 | Opsins                     |
| 3OEO | 4XEE | 318 | Neurotensin                |
| 3OEO | 4XES | 299 | Neurotensin                |
| 4MQT | 4XNV | 217 | P2Y                        |
| 3OEO | 4XNW | 159 | P2Y                        |
| 4MBS | 4XT1 | 252 | Unclassified               |
| 4MBS | 4XT3 | 228 | Unclassified               |
| 6LIO | 4YAY | 264 | Angiotensin                |
| 3OEO | 4Z34 | 292 | Lysophospholipid (LPA)     |
| 3OEO | 4Z35 | 234 | Lysophospholipid (LPA)     |
| 3OEO | 4Z36 | 280 | Lysophospholipid (LPA)     |
| 4MBS | 4ZJ8 | 266 | Orexin                     |
| 4MBS | 4ZJC | 261 | Orexin                     |
| 4MBS | 4ZUD | 274 | Angiotensin                |
| 4MBS | 4ZWJ | 217 | Opsins                     |
| 4MBS | 5A8E | 184 | Adrenoceptors              |
| 4MBS | 5C1M | 219 | Opioid                     |
| 4MBS | 5CXV | 181 | Acetylcholine (muscarinic) |
| 4N4W | 5CXV | 164 | Acetylcholine (muscarinic) |
| 4MBS | 5D5A | 249 | Adrenoceptors              |
| 4MBS | 5DGY | 211 | Opsins                     |

|      |      |     |                            |
|------|------|-----|----------------------------|
| 4MBS | 5DHG | 285 | Opioid                     |
| 4MBS | 5DHH | 281 | Opioid                     |
| 4MBS | 5DSG | 210 | Acetylcholine (muscarinic) |
| 3OE0 | 5DYS | 172 | Opsins                     |
| 4MBS | 5EE7 | 95  | Glucagon                   |
| 4MBS | 5EN0 | 167 | Opsins                     |
| 4MBS | 5F8U | 250 | Adrenoceptors              |
| 3ODU | 5GLH | 199 | Endothelin                 |
| 4OO9 | 5GLI | 159 | Endothelin                 |
| 5UIG | 5N2S | 156 | Adenosine                  |
| 4OO9 | 5NX2 | 173 | Glucagon                   |
| 4MBS | 5O9H | 162 | Complement peptide         |
| 3OE0 | 5T04 | 270 | Neurotensin                |
| 4MBS | 5TE3 | 157 | Opsins                     |
| 4OR2 | 5TE5 | 243 | Opsins                     |
| 4MBS | 5TGZ | 119 | Cannabinoid                |
| 4MBS | 5TUD | 299 | 5-Hydroxytryptamine        |
| 4MBS | 5TVN | 221 | 5-Hydroxytryptamine        |
| 3OE0 | 5U09 | 112 | Cannabinoid                |
| 3ODU | 5UEN | 214 | Adenosine                  |
| 4MBS | 5UNF | 229 | Angiotensin                |
| 4MBS | 5UNG | 263 | Angiotensin                |
| 4MBS | 5UNH | 251 | Angiotensin                |
| 4MBS | 5V54 | 147 | 5-Hydroxytryptamine        |
| 3OE0 | 5VBL | 312 | Apelin                     |
| 4MBS | 5VEW | 131 | Glucagon                   |
| 4OO9 | 5VEX | 150 | Glucagon                   |
| 3OE0 | 5W0P | 176 | Opsins                     |
| 4MBS | 5WB1 | 284 | Unclassified               |
| 4MBS | 5WB2 | 233 | Unclassified               |
| 4MBS | 5WIU | 210 | Dopamine                   |
| 4MBS | 5WIV | 193 | Dopamine                   |
| 4MBS | 5WKT | 162 | Opsins                     |

|      |      |     |                            |
|------|------|-----|----------------------------|
| 4MBS | 5WQC | 285 | Orexin                     |
| 4MBS | 5WS3 | 285 | Orexin                     |
| 4MBS | 5X33 | 211 | Leukotriene                |
| 4MBS | 5X93 | 161 | Endothelin                 |
| 4MBS | 5XEZ | 256 | Glucagon                   |
| 3OEO | 5XF1 | 244 | Glucagon                   |
| 4MBS | 5XJM | 282 | Angiotensin                |
| 4MBS | 5XPR | 207 | Endothelin                 |
| 3OEO | 5XR8 | 157 | Cannabinoid                |
| 3OEO | 5XRA | 194 | Cannabinoid                |
| 5NDD | 5XSZ | 135 | Lysophospholipid (LPA)     |
| 4MBS | 5YHL | 117 | Prostanoid                 |
| 4K5Y | 5YQZ | 147 | Glucagon                   |
| 4MBS | 5YWY | 123 | Prostanoid                 |
| 4MBS | 5ZBH | 197 | Neuropeptide Y             |
| 3OEO | 5ZBQ | 195 | Neuropeptide Y             |
| 4MBS | 5ZHP | 241 | Acetylcholine (muscarinic) |
| 4MBS | 5ZKP | 272 | Platelet-activating factor |
| 4MBS | 5ZKQ | 234 | Platelet-activating factor |
| 3OEO | 5ZTY | 232 | Cannabinoid                |
| 3OEO | 6A93 | 227 | 5-Hydroxytryptamine        |
| 4MBS | 6A94 | 182 | 5-Hydroxytryptamine        |
| 4MBS | 6AKX | 313 | Chemokine                  |
| 4MBS | 6AKY | 384 | Chemokine                  |
| 4OO9 | 6B73 | 168 | Opioid                     |
| 3OEO | 6BD4 | 204 | Frizzled                   |
| 4MBS | 6BQG | 283 | 5-Hydroxytryptamine        |
| 3OEO | 6BQH | 223 | 5-Hydroxytryptamine        |
| 4MBS | 6C1Q | 248 | Complement peptide         |
| 4MBS | 6C1R | 227 | Complement peptide         |
| 4N4W | 6CM4 | 220 | Dopamine                   |
| 3ODU | 6D26 | 329 | Prostanoid                 |
| 3ODU | 6D27 | 286 | Prostanoid                 |



|      |      |     |                     |
|------|------|-----|---------------------|
| 5L7I | 6D32 | 221 | Frizzled            |
| 5L7I | 6D35 | 177 | Frizzled            |
| 4MBS | 6DO1 | 252 | Angiotensin         |
| 4MBS | 6DRX | 264 | 5-Hydroxytryptamine |
| 4MBS | 6DRY | 237 | 5-Hydroxytryptamine |
| 4MBS | 6DRZ | 263 | 5-Hydroxytryptamine |
| 4MBS | 6DS0 | 200 | 5-Hydroxytryptamine |
| 4MBS | 6E59 | 275 | Tachykinin          |
| 4MBS | 6E67 | 214 | Adrenoceptors       |
| 4OR2 | 6FJ3 | 263 | Parathyroid hormone |
| 4OR2 | 6FK6 | 198 | Opsins              |
| 4N4W | 6FK7 | 169 | Opsins              |
| 4OO9 | 6FK8 | 183 | Opsins              |
| 4OR2 | 6FK9 | 185 | Opsins              |
| 4OO9 | 6FKA | 185 | Opsins              |
| 4N4W | 6FKB | 145 | Opsins              |
| 4OR2 | 6FKC | 190 | Opsins              |
| 4OO9 | 6FKD | 165 | Opsins              |
| 4MBS | 6FUF | 198 | Opsins              |
| 4MBS | 6GPS | 218 | Chemokine           |
| 4MBS | 6GPX | 317 | Chemokine           |
| 4MBS | 6GT3 | 205 | Adenosine           |
| 4MBS | 6H7J | 170 | Adrenoceptors       |
| 4MBS | 6H7L | 191 | Adrenoceptors       |
| 4MBS | 6H7M | 223 | Adrenoceptors       |
| 4MBS | 6H7N | 192 | Adrenoceptors       |
| 4MBS | 6H7O | 186 | Adrenoceptors       |
| 4MBS | 6HLL | 287 | Tachykinin          |
| 3OE0 | 6HLO | 293 | Tachykinin          |
| 4MBS | 6HLP | 332 | Tachykinin          |
| 5LWE | 6I9K | 174 | Opsins              |
| 5KW2 | 6IBB | 99  | Succinate           |
| 4MBS | 6IBL | 158 | Adrenoceptors       |

|      |      |     |                            |
|------|------|-----|----------------------------|
| 3ODU | 6IGK | 178 | Endothelin                 |
| 4MBS | 6IGL | 212 | Endothelin                 |
| 6LIO | 6IIV | 98  | Prostanoid                 |
| 3ODU | 6IQL | 219 | Dopamine                   |
| 4MBS | 6J20 | 248 | Tachykinin                 |
| 4MBS | 6J21 | 266 | Tachykinin                 |
| 4MBS | 6JOD | 311 | Angiotensin                |
| 3OEO | 6JZH | 174 | Adenosine                  |
| 4MBS | 6K1Q | 188 | Endothelin                 |
| 4MBS | 6KJV | 178 | Glucagon                   |
| 4OR2 | 6KK1 | 149 | Glucagon                   |
| 3OEO | 6KK7 | 152 | Glucagon                   |
| 3OEO | 6KNM | 290 | Apelin                     |
| 3OEO | 6KO5 | 340 | Ghrelin                    |
| 4MBS | 6KP6 | 213 | Acetylcholine (muscarinic) |
| 3OEO | 6KQI | 169 | Cannabinoid                |
| 3OEO | 6KUW | 245 | Adrenoceptors              |
| 3OEO | 6KUX | 321 | Adrenoceptors              |
| 4MBS | 6KUY | 268 | Adrenoceptors              |
| 4MBS | 6LN2 | 317 | Glucagon                   |
| 4MBS | 6LRY | 175 | Endothelin                 |
| 4MBS | 6LUQ | 177 | Dopamine                   |
| 4MBS | 6LW5 | 243 | Formylpeptide              |
| 6LIO | 6M9T | 132 | Prostanoid                 |
| 4MBS | 6ME2 | 122 | Melatonin                  |
| 5TZY | 6ME3 | 108 | Melatonin                  |
| 4MBS | 6ME4 | 123 | Melatonin                  |
| 4MBS | 6ME5 | 137 | Melatonin                  |
| 3OEO | 6ME6 | 156 | Melatonin                  |
| 5KW2 | 6ME7 | 96  | Melatonin                  |
| 3OEO | 6ME8 | 153 | Melatonin                  |
| 3OEO | 6ME9 | 226 | Melatonin                  |
| 3OEO | 6MH8 | 237 | Adenosine                  |

|      |      |     |                            |
|------|------|-----|----------------------------|
| 4OO9 | 6NWE | 191 | Opsins                     |
| 4N4W | 6O3C | 289 | Frizzled                   |
| 4MBS | 6OL9 | 236 | Acetylcholine (muscarinic) |
| 6LIO | 6OS0 | 223 | Angiotensin                |
| 4MBS | 6OS1 | 229 | Angiotensin                |
| 4MBS | 6OS2 | 256 | Angiotensin                |
| 4OO9 | 6PEL | 155 | Opsins                     |
| 4MBS | 6PGS | 142 | Opsins                     |
| 4MBS | 6PH7 | 125 | Opsins                     |
| 3OE0 | 6PRZ | 223 | Adrenoceptors              |
| 4MBS | 6PS0 | 234 | Adrenoceptors              |
| 4MBS | 6PS1 | 139 | Adrenoceptors              |
| 3OE0 | 6PS2 | 208 | Adrenoceptors              |
| 4MBS | 6PS3 | 206 | Adrenoceptors              |
| 3OE0 | 6PS4 | 252 | Adrenoceptors              |
| 4MBS | 6PS5 | 179 | Adrenoceptors              |
| 4MBS | 6PS6 | 175 | Adrenoceptors              |
| 3OE0 | 6PS7 | 181 | Adenosine                  |
| 4MBS | 6PS8 | 144 | Melatonin                  |
| 4OO9 | 6PT2 | 244 | Opioid                     |
| 4OO9 | 6PT3 | 230 | Opioid                     |
| 3ODU | 6RNK | 181 | Succinate                  |
| 3OE0 | 6RZ4 | 324 | Leukotriene                |
| 3OE0 | 6RZ5 | 242 | Leukotriene                |
| 3OE0 | 6RZ6 | 218 | Leukotriene                |
| 3OE0 | 6RZ7 | 279 | Leukotriene                |
| 3OE0 | 6RZ8 | 244 | Leukotriene                |
| 3OE0 | 6RZ9 | 253 | Leukotriene                |
| 3ODU | 6S0Q | 128 | Adenosine                  |
| 3ODU | 6TO7 | 197 | Orexin                     |
| 4MBS | 6TOD | 270 | Orexin                     |
| 4MBS | 6TOS | 237 | Orexin                     |
| 4MBS | 6TOT | 232 | Orexin                     |

|      |      |     |                            |
|------|------|-----|----------------------------|
| 4MBS | 6TP3 | 221 | Orexin                     |
| 4MBS | 6TP4 | 195 | Orexin                     |
| 4MBS | 6TP6 | 237 | Orexin                     |
| 4MBS | 6TPG | 246 | Orexin                     |
| 4MBS | 6TPJ | 223 | Orexin                     |
| 3OEO | 6TPK | 187 | Vasopressin and oxytocin   |
| 3ODU | 6TPN | 211 | Orexin                     |
| 4MBS | 6TQ4 | 203 | Orexin                     |
| 4MBS | 6TQ6 | 191 | Orexin                     |
| 3ODU | 6TQ7 | 160 | Orexin                     |
| 4MBS | 6TQ9 | 152 | Orexin                     |
| 4MBS | 6V9S | 216 | Orexin                     |
| 4MBS | 6VI4 | 189 | Opioid                     |
| 4MBS | 6W25 | 262 | Melanocortin               |
| 3OEO | 6WJC | 214 | Acetylcholine (muscarinic) |
| 3OEO | 7C61 | 250 | 5-Hydroxytryptamine        |
| 3OEO | 7C6A | 283 | Angiotensin                |

**Table S6. Docking results**

| Target_Parent_Ligand <sup>a</sup> | Distance to FTMap results |                       |                                   | Distance to ligand in parent structure |                               |                                           |
|-----------------------------------|---------------------------|-----------------------|-----------------------------------|----------------------------------------|-------------------------------|-------------------------------------------|
|                                   | Pose <sup>b</sup>         | Hot spot <sup>c</sup> | Distance to hot spot <sup>d</sup> | Pose <sup>e</sup>                      | Ligand in parent <sup>f</sup> | Distance to ligand in parent <sup>g</sup> |
| 1F88_4OR2_ASD02820003             | 6                         | 4.008                 | 2.64                              | 6                                      | FM9                           | 1.92                                      |
| 1GZM_4OR2_ASD02820003             | 6                         | 5.005                 | 1.28                              | 9                                      | FM9                           | 2.32                                      |
| 1HZX_4N4W_ASD02820003             | 2                         | 7.003                 | 1.74                              | 7                                      | SNT                           | 3.93                                      |
| 1HZX_4OR2_ASD02820003             | 8                         | 7.003                 | 1.12                              | 4                                      | FM9                           | 1.65                                      |
| 1L9H_4N4W_ASD02820003             | 9                         | 8.005                 | 1.85                              | 9                                      | SNT                           | 3.83                                      |
| 1U19_4N4W_ASD02820003             | 7                         | 8.005                 | 1.67                              | 4                                      | SNT                           | 4.21                                      |
| 1U19_4OR2_ASD02820003             | 7                         | 8.005                 | 1.79                              | 7                                      | FM9                           | 1.55                                      |
| 2G87_4N4W_ASD02820003             | 2                         | 0.013                 | 2.34                              | 4                                      | SNT                           | 3.88                                      |
| 2G87_4OR2_ASD02820003             | 7                         | 0.013                 | 1.61                              | 4                                      | FM9                           | 2.55                                      |
| 2HPY_4N4W_ASD02820003             | 6                         | 3.008                 | 1.01                              | 9                                      | SNT                           | 3.43                                      |
| 2HPY_4OR2_ASD02820003             | 8                         | 3.008                 | 0.99                              | 8                                      | FM9                           | 2.59                                      |
| 2I35_4N4W_ASD02820003             | 5                         | 2.012                 | 2.06                              | 5                                      | SNT                           | 3.99                                      |
| 2I35_4OR2_ASD02820003             | 7                         | 2.012                 | 1.88                              | 6                                      | FM9                           | 2.69                                      |
| 2I36_4MBS_ASD02820003             | 6                         | 0.013                 | 1.45                              | 4                                      | MRV                           | 3.17                                      |
| 2I36_4N4W_ASD02820003             | 7                         | 3.011                 | 1.40                              | 2                                      | SNT                           | 3.96                                      |
| 2I37_4N4W_ASD02820003             | 4                         | 3.011                 | 1.63                              | 7                                      | SNT                           | 3.54                                      |
| 2I37_4OR2_ASD02820003             | 4                         | 1.016                 | 3.26                              | 1                                      | FM9                           | 1.90                                      |
| 2J4Y_4N4W_ASD02820003             | 8                         | 4.01                  | 1.83                              | 8                                      | SNT                           | 3.30                                      |
| 2J4Y_4OO9_ASD02820003             | 4                         | 2.012                 | 2.13                              | 2                                      | 2U8                           | 3.39                                      |
| 2PED_4N4W_ASD02820003             | 5                         | 5.005                 | 1.01                              | 5                                      | SNT                           | 3.88                                      |
| 2PED_4OR2_ASD02820003             | 6                         | 5.005                 | 1.48                              | 2                                      | FM9                           | 2.59                                      |
| 2X72_4MBS_ASD02820003             | 7                         | 4.008                 | 1.02                              | 7                                      | MRV                           | 2.13                                      |
| 3C9L_4N4W_ASD02820003             | 6                         | 5.008                 | 0.91                              | 8                                      | SNT                           | 3.66                                      |
| 3C9L_4OR2_ASD02820003             | 5                         | 5.008                 | 0.88                              | 6                                      | FM9                           | 2.36                                      |
| 3C9M_4N4W_ASD02820003             | 5                         | 5.007                 | 2.17                              | 2                                      | SNT                           | 3.78                                      |
| 3C9M_4OR2_ASD02820003             | 7                         | 5.007                 | 1.32                              | 3                                      | FM9                           | 3.29                                      |
| 3CAP_4MBS_ASD02820003             | 3                         | 6.006                 | 1.65                              | 3                                      | MRV                           | 2.56                                      |
| 3DQB_4MBS_ASD02820003             | 7                         | 1.012                 | 1.04                              | 5                                      | MRV                           | 3.11                                      |
| 3OAX_4N4W_ASD02820003             | 6                         | 12.003                | 1.84                              | 7                                      | SNT                           | 3.59                                      |

|                       |    |        |       |    |              |       |
|-----------------------|----|--------|-------|----|--------------|-------|
| 3OAX_4OR2_ASD02820003 | 7  | 12.003 | 1.26  | 8  | FM9          | 1.30  |
| 3OE9_3ODU_ASD04570023 | 1  | 5.007  | 2.90  | 5  | ITD          | 1.97  |
| 3OE9_4K5Y_ASD04570023 | 1  | 9.003  | 6.31  | 1  | 1Q5          | 19.26 |
| 3OE9_5NDD_ASD04570023 | 2  | 3.009  | 2.95  | 2  | 8TZ          | 2.78  |
| 3PBL_4MBS_ASD04640014 | 8  | 1.014  | 1.44  | 3  | MRV          | 1.98  |
| 3PBL_4N4W_ASD04640014 | 5  | 1.014  | 1.39  | 6  | SNT          | 3.71  |
| 3PBL_5KW2_ASD04640014 | 3  | 2.011  | 1.86  | 3  | 6XQ          | 2.56  |
| 3PBL_5NDD_ASD04640014 | 4  | 1.014  | 1.36  | 2  | 8TZ          | 0.97  |
| 3PQR_4MBS_ASD02820003 | 3  | 3.009  | 2.02  | 3  | MRV          | 3.12  |
| 3PQR_4N4W_ASD02820003 | 7  | 3.009  | 1.86  | 6  | SNT          | 3.87  |
| 3PWH_3ODU_ASD03130013 | 6  | 7.005  | 2.59  | 6  | ITD          | 2.26  |
| 3PWH_5TZY_ASD03130013 | 2  | 1.015  | 3.31  | 7  | 7OS          | 4.11  |
| 3PWH_5X7D_ASD03130013 | 1  | 0.024  | 2.92  | 4  | 8VS          | 3.33  |
| 3PXO_4MBS_ASD02820003 | 9  | 2.013  | 1.70  | 9  | MRV          | 3.30  |
| 3PXO_4N4W_ASD02820003 | 9  | 2.013  | 1.69  | 8  | SNT          | 4.20  |
| 3PXO_4N4W_ASD05688001 | 1  | 11.001 | 12.04 | 1  | SNT          | 16.60 |
| 3VW7_3OE0_ASD05503050 | 1  | 3.01   | 1.90  | 6  | PRD- chain I | 5.23  |
| 3VW7_3OE0_ASD05503052 | 3  | 0.018  | 1.79  | 2  | PRD- chain I | 2.17  |
| 3VW7_5NDZ_ASD05503050 | 3  | 5.005  | 1.34  | 1  | 8UN          | 1.96  |
| 3VW7_5NDZ_ASD05503052 | 1  | 5.005  | 2.19  | 3  | 8UN          | 2.34  |
| 4A4M_4MBS_ASD02820003 | 1  | 0.014  | 1.61  | 9  | MRV          | 3.94  |
| 4A4M_4MBS_ASD05688001 | 6  | 4.009  | 1.69  | 10 | MRV          | 3.63  |
| 4A4M_4N4W_ASD02820003 | 5  | 0.014  | 1.29  | 2  | SNT          | 3.37  |
| 4A4M_4N4W_ASD05688001 | 1  | 0.014  | 1.82  | 1  | SNT          | 3.50  |
| 4BEY_4MBS_ASD02820003 | 2  | 0.019  | 1.97  | 5  | MRV          | 2.41  |
| 4BEY_4MBS_ASD05688001 | 3  | 1.016  | 2.71  | 2  | MRV          | 3.33  |
| 4BEY_4N4W_ASD02820003 | 2  | 2.010  | 1.72  | 1  | SNT          | 3.01  |
| 4BEY_4N4W_ASD05688001 | 9  | 12.002 | 13.76 | 1  | SNT          | 17.15 |
| 4BEZ_4MBS_ASD02820003 | 4  | 2.011  | 1.06  | 10 | MRV          | 2.33  |
| 4BEZ_4MBS_ASD05688001 | 1  | 1.013  | 2.13  | 1  | MRV          | 3.16  |
| 4BEZ_4N4W_ASD02820003 | 5  | 1.013  | 1.47  | 7  | SNT          | 3.01  |
| 4BEZ_4N4W_ASD05688001 | 1  | 8.004  | 12.68 | 1  | SNT          | 17.09 |
| 4DJH_4MBS_ASD00170299 | 10 | 4.007  | 1.87  | 8  | MRV          | 1.43  |
| 4DJH_4MBS_ASD03170003 | 1  | 1.023  | 2.49  | 2  | MRV          | 2.34  |

|                       |    |        |      |    |              |      |
|-----------------------|----|--------|------|----|--------------|------|
| 4DJH_5NDD_ASD00170299 | 5  | 4.007  | 1.86 | 2  | 8TZ          | 2.16 |
| 4DJH_5NDD_ASD03170003 | 2  | 4.007  | 2.42 | 5  | 8TZ          | 1.94 |
| 4DJH_6LI0_ASD00170299 | 10 | 0.027  | 1.45 | 8  | D7W          | 4.46 |
| 4DJH_6LI0_ASD03170003 | 1  | 10.001 | 1.88 | 2  | D7W          | 4.75 |
| 4EJ4_4N4W_ASD03180043 | 7  | 7.005  | 3.22 | 1  | SNT          | 3.69 |
| 4EJ4_4N4W_ASD16020002 | 2  | 7.005  | 2.52 | 1  | SNT          | 3.85 |
| 4EJ4_4OO9_ASD03180043 | 3  | 7.005  | 2.61 | 4  | 2U8          | 4.57 |
| 4EJ4_4OO9_ASD16020002 | 3  | 0.022  | 2.14 | 3  | 2U8          | 3.57 |
| 4EJ4_5KW2_ASD03180043 | 2  | 6.006  | 3.15 | 1  | 6XQ          | 3.71 |
| 4EJ4_5KW2_ASD16020002 | 2  | 6.006  | 3.31 | 2  | 6XQ          | 4.16 |
| 4J4Q_4MBS_ASD02820003 | 8  | 0.017  | 1.25 | 3  | MRV          | 2.43 |
| 4J4Q_4MBS_ASD05688001 | 7  | 0.017  | 1.66 | 5  | MRV          | 2.94 |
| 4J4Q_4N4W_ASD02820003 | 5  | 2.015  | 0.71 | 3  | SNT          | 3.67 |
| 4J4Q_4N4W_ASD05688001 | 5  | 2.015  | 1.70 | 4  | SNT          | 3.47 |
| 4L6R_3OE0_ASD04910208 | 1  | 1.017  | 0.80 | 7  | PRD- chain I | 7.84 |
| 4L6R_5NDD_ASD04910208 | 5  | 5.007  | 0.69 | 3  | 8TZ          | 1.66 |
| 4N6H_4MBS_ASD03180043 | 1  | 4.011  | 3.47 | 2  | MRV          | 0.39 |
| 4N6H_4MBS_ASD16020002 | 2  | 4.011  | 3.03 | 9  | MRV          | 0.59 |
| 4N6H_4N4W_ASD03180043 | 7  | 4.011  | 3.59 | 1  | SNT          | 4.48 |
| 4N6H_4N4W_ASD16020002 | 2  | 3.011  | 2.97 | 8  | SNT          | 3.52 |
| 4NTJ_4OR2_ASD13170001 | 3  | 6.005  | 2.48 | 2  | FM9          | 1.73 |
| 4NTJ_4OR2_ASD13170002 | 3  | 6.005  | 1.57 | 1  | FM9          | 1.61 |
| 4NTJ_5KW2_ASD13170001 | 1  | 0.017  | 2.25 | 2  | 6XQ          | 3.74 |
| 4NTJ_5KW2_ASD13170002 | 1  | 0.017  | 2.16 | 1  | 6XQ          | 3.68 |
| 4PXF_4MBS_ASD02820003 | 9  | 2.011  | 1.15 | 9  | MRV          | 2.92 |
| 4PXF_4MBS_ASD05688001 | 3  | 6.006  | 2.36 | 9  | MRV          | 3.49 |
| 4PXZ_5TZY_ASD13170001 | 4  | 0.015  | 2.62 | 1  | 7OS          | 2.53 |
| 4PXZ_5TZY_ASD13170002 | 1  | 0.015  | 2.94 | 1  | 7OS          | 2.54 |
| 4PY0_3OE0_ASD13170001 | 5  | 5.006  | 2.10 | 3  | PRD- chain I | 8.88 |
| 4PY0_3OE0_ASD13170002 | 3  | 5.006  | 2.00 | 6  | PRD- chain I | 8.15 |
| 4PY0_5TZY_ASD13170001 | 3  | 0.014  | 2.43 | 3  | 7OS          | 3.73 |
| 4PY0_5TZY_ASD13170002 | 1  | 0.014  | 2.95 | 1  | 7OS          | 4.37 |
| 4RWA_4MBS_ASD03180043 | 3  | 7.003  | 2.95 | 10 | MRV          | 0.94 |
| 4RWA_4MBS_ASD16020002 | 5  | 3.012  | 2.71 | 4  | MRV          | 0.92 |

|                       |    |        |      |    |              |      |
|-----------------------|----|--------|------|----|--------------|------|
| 4RWA_4N4W_ASD03180043 | 2  | 7.003  | 2.98 | 2  | SNT          | 3.63 |
| 4RWA_4N4W_ASD16020002 | 8  | 7.003  | 2.77 | 2  | SNT          | 3.91 |
| 4RWD_4MBS_ASD03180043 | 3  | 2.013  | 3.12 | 4  | MRV          | 0.91 |
| 4RWD_4MBS_ASD16020002 | 4  | 6.007  | 2.74 | 7  | MRV          | 1.29 |
| 4RWD_4N4W_ASD03180043 | 6  | 2.013  | 3.00 | 2  | SNT          | 4.80 |
| 4RWD_4N4W_ASD16020002 | 7  | 3.01   | 3.38 | 3  | SNT          | 4.87 |
| 4RWD_5NDD_ASD03180043 | 5  | 6.007  | 2.75 | 5  | 8TZ          | 4.12 |
| 4RWD_5NDD_ASD16020002 | 4  | 6.007  | 2.94 | 3  | 8TZ          | 4.24 |
| 4X1H_4MBS_ASD02820003 | 3  | 1.017  | 1.38 | 3  | MRV          | 2.17 |
| 4X1H_4MBS_ASD05688001 | 3  | 1.017  | 1.29 | 7  | MRV          | 2.77 |
| 4X1H_4N4W_ASD02820003 | 4  | 1.017  | 0.86 | 1  | SNT          | 3.56 |
| 4X1H_4N4W_ASD05688001 | 2  | 1.017  | 1.41 | 1  | SNT          | 3.26 |
| 4XNV_4MQT_ASD03570002 | 2  | 3.011  | 2.93 | 2  | 2CU          | 4.54 |
| 4XNV_4MQT_ASD03570029 | 4  | 3.011  | 1.98 | 5  | 2CU          | 2.60 |
| 4XNV_5L7I_ASD03570002 | 1  | 3.011  | 2.91 | 4  | VIS          | 2.46 |
| 4XNV_5L7I_ASD03570029 | 9  | 3.011  | 2.02 | 3  | VIS          | 2.07 |
| 4XNV_6LI0_ASD03570002 |    |        |      |    |              |      |
| 4XNV_6LI0_ASD03570029 |    |        |      |    |              |      |
| 4XNW_3OE0_ASD03570002 | 8  | 6.005  | 2.41 | 1  | PRD- chain I | 5.67 |
| 4XNW_3OE0_ASD03570029 | 4  | 6.005  | 1.95 | 8  | PRD- chain I | 5.46 |
| 4XT1_4MBS_ASD01350033 | 10 | 2.01   | 1.40 | 10 | MRV          | 3.37 |
| 4XT1_4MBS_ASD01350061 | 8  | 2.01   | 1.70 | 8  | MRV          | 3.58 |
| 4XT1_5NDD_ASD01350033 | 1  | 4.008  | 1.99 | 8  | 8TZ          | 1.67 |
| 4XT1_5NDD_ASD01350061 | 4  | 4.008  | 1.73 | 2  | 8TZ          | 0.73 |
| 4XT1_6LI0_ASD01350033 | 1  | 10.003 | 1.57 | 1  | D7W          | 5.66 |
| 4XT1_6LI0_ASD01350061 | 1  | 10.003 | 1.69 | 1  | D7W          | 5.95 |
| 4XT3_4MBS_ASD01350033 | 8  | 1.012  | 2.01 | 6  | MRV          | 3.36 |
| 4XT3_4MBS_ASD01350061 | 2  | 0.019  | 1.73 | 7  | MRV          | 4.03 |
| 4XT3_5NDD_ASD01350033 | 5  | 0.019  | 2.12 | 6  | 8TZ          | 1.44 |
| 4XT3_5NDD_ASD01350061 | 6  | 1.012  | 1.31 | 4  | 8TZ          | 0.68 |
| 4XT3_6LI0_ASD01350033 | 6  | 5.009  | 1.64 | 9  | D7W          | 7.06 |
| 4XT3_6LI0_ASD01350061 | 1  | 7.005  | 2.31 | 6  | D7W          | 6.94 |
| 4Z34_3OE0_ASD14870001 | 7  | 7.003  | 1.84 | 4  | PRD- chain I | 9.31 |
| 4Z34_3OE0_ASD14870005 | 6  | 7.003  | 2.11 | 5  | PRD- chain I | 8.98 |



|                       |    |        |      |    |              |       |
|-----------------------|----|--------|------|----|--------------|-------|
| 4Z34_4N4W_ASD14870001 | 1  | 7.003  | 2.08 | 10 | SNT          | 2.74  |
| 4Z34_4N4W_ASD14870005 | 3  | 7.003  | 2.05 | 1  | SNT          | 3.81  |
| 4Z34_4PHU_ASD14870001 | 1  | 1.014  | 1.80 | 1  | 2YB          | 13.17 |
| 4Z34_4PHU_ASD14870005 | 1  | 5.006  | 2.13 | 1  | 2YB          | 4.26  |
| 4Z34_5LWE_ASD14870001 | 3  | 7.003  | 1.59 | 6  | 79K          | 3.72  |
| 4Z34_5LWE_ASD14870005 | 1  | 7.003  | 2.02 | 1  | 79K          | 3.74  |
| 4Z35_3OE0_ASD14870001 | 2  | 3.008  | 3.68 | 5  | PRD- chain I | 9.20  |
| 4Z35_3OE0_ASD14870005 | 7  | 4.006  | 2.68 | 2  | PRD- chain I | 8.54  |
| 4Z35_4N4W_ASD14870001 | 4  | 3.008  | 3.43 | 9  | SNT          | 2.80  |
| 4Z35_4N4W_ASD14870005 | 7  | 10.004 | 2.30 | 4  | SNT          | 3.50  |
| 4Z35_4PHU_ASD14870001 | 1  | 4.006  | 2.23 | 1  | 2YB          | 12.86 |
| 4Z35_4PHU_ASD14870005 | 3  | 1.016  | 2.19 | 2  | 2YB          | 3.14  |
| 4Z35_5LWE_ASD14870001 | 2  | 3.008  | 3.86 | 3  | 79K          | 2.40  |
| 4Z35_5LWE_ASD14870005 | 8  | 10.004 | 3.40 | 1  | 79K          | 3.58  |
| 4Z36_3OE0_ASD14870001 | 5  | 4.008  | 2.64 | 7  | PRD- chain I | 8.97  |
| 4Z36_3OE0_ASD14870005 | 1  | 5.007  | 2.45 | 1  | PRD- chain I | 8.69  |
| 4Z36_4N4W_ASD14870001 | 6  | 4.008  | 2.65 | 8  | SNT          | 3.24  |
| 4Z36_4N4W_ASD14870005 | 3  | 4.008  | 2.19 | 9  | SNT          | 3.56  |
| 4Z36_5LWE_ASD14870001 | 8  | 4.008  | 2.49 | 3  | 79K          | 2.75  |
| 4Z36_5LWE_ASD14870005 | 3  | 4.008  | 2.73 | 4  | 79K          | 2.45  |
| 4Z36_5TZR_ASD14870001 | 4  | 5.007  | 1.81 | 4  | MK6          | 13.30 |
| 4Z36_5TZR_ASD14870005 | 1  | 9.004  | 2.18 | 1  | MK6          | 4.94  |
| 5CXV_4MBS_ASD01810699 | 1  | 0.026  | 0.34 | 6  | MRV          | 4.80  |
| 5CXV_4MBS_ASD01811561 | 5  | 0.026  | 1.04 | 5  | MRV          | 4.97  |
| 5CXV_4N4W_ASD01810699 | 1  | 0.026  | 0.17 | 2  | SNT          | 4.33  |
| 5CXV_4N4W_ASD01811561 | 7  | 1.018  | 1.10 | 4  | SNT          | 5.59  |
| 5D5A_4MBS_ASD01580008 | 10 | 0.018  | 1.08 | 6  | MRV          | 3.75  |
| 5D5A_4MBS_ASD03130023 | 3  | 11.002 | 1.47 | 4  | MRV          | 1.25  |
| 5DSG_4MBS_ASD01840213 | 10 | 2.015  | 2.12 | 3  | MRV          | 4.71  |
| 5DSG_4MBS_ASD01914813 | 4  | 2.015  | 1.32 | 3  | MRV          | 4.29  |
| 5DSG_4N4W_ASD01840213 | 1  | 3.011  | 2.42 | 6  | SNT          | 5.55  |
| 5DSG_4N4W_ASD01914813 | 9  | 6.004  | 1.03 | 2  | SNT          | 4.65  |
| 5DYS_3OE0_ASD02820003 | 3  | 1.013  | 1.71 | 7  | PRD- chain I | 12.70 |
| 5DYS_3OE0_ASD05688001 | 3  | 1.013  | 2.74 | 6  | PRD- chain I | 12.99 |

|                       |   |        |      |    |     |      |
|-----------------------|---|--------|------|----|-----|------|
| 5DYS_4N4W_ASD02820003 | 7 | 3.011  | 2.00 | 7  | SNT | 3.59 |
| 5DYS_4N4W_ASD05688001 | 4 | 0.014  | 1.79 | 4  | SNT | 3.39 |
| 5EE7_4MBS_ASD04910208 | 6 | 0.014  | 1.43 | 10 | MRV | 5.30 |
| 5EE7_6LI0_ASD04910208 | 2 | 3.01   | 0.24 | 2  | D7W | 0.89 |
| 5EN0_4MBS_ASD02820003 | 8 | 3.01   | 1.92 | 8  | MRV | 2.59 |
| 5EN0_4MBS_ASD05688001 | 3 | 3.01   | 2.82 | 3  | MRV | 3.39 |
| 5EN0_4N4W_ASD02820003 | 2 | 1.014  | 1.64 | 5  | SNT | 4.86 |
| 5EN0_4N4W_ASD05688001 | 4 | 1.014  | 1.56 | 9  | SNT | 1.24 |
| 5N2S_5NDD_ASD00170496 | 7 | 7.007  | 1.72 | 7  | 8TZ | 1.46 |
| 5N2S_5NDD_ASD00170902 |   |        |      |    |     |      |
| 5N2S_5UIG_ASD00170496 | 1 | 7.007  | 1.53 | 7  | 8D1 | 1.87 |
| 5N2S_5UIG_ASD00170902 |   |        |      |    |     |      |
| 5N2S_6LI0_ASD00170496 | 3 | 7.007  | 2.93 | 2  | D7W | 4.58 |
| 5N2S_6LI0_ASD00170902 |   |        |      |    |     |      |
| 5NX2_4K5Y_ASD01180443 | 2 | 3.009  | 0.59 | 10 | 1Q5 | 4.19 |
| 5NX2_4N4W_ASD01180443 | 1 | 2.013  | 0.40 | 1  | SNT | 4.24 |
| 5NX2_4OO9_ASD01180443 | 1 | 2.013  | 0.38 | 9  | 2U8 | 3.41 |
| 5O9H_3ODU_ASD03160012 | 1 | 11.001 | 2.81 | 3  | ITD | 2.51 |
| 5O9H_3ODU_ASD11780002 | 5 | 11.001 | 2.12 | 6  | ITD | 1.94 |
| 5O9H_4MBS_ASD03160012 | 4 | 11.001 | 3.13 | 4  | MRV | 3.11 |
| 5O9H_4MBS_ASD11780002 | 8 | 11.001 | 0.77 | 2  | MRV | 2.82 |
| 5O9H_5NDD_ASD03160012 | 2 | 2.013  | 2.79 | 2  | 8TZ | 2.63 |
| 5O9H_5NDD_ASD11780002 | 1 | 2.013  | 3.19 | 3  | 8TZ | 2.95 |
| 5O9H_6LI0_ASD03160012 |   |        |      |    |     |      |
| 5O9H_6LI0_ASD11780002 |   |        |      |    |     |      |
| 5TE3_4MBS_ASD02820003 | 1 | 9.005  | 1.49 | 8  | MRV | 3.00 |
| 5TE3_4MBS_ASD05688001 | 8 | 9.005  | 1.40 | 8  | MRV | 2.98 |
| 5TE3_4N4W_ASD02820003 | 6 | 2.01   | 1.53 | 5  | SNT | 3.89 |
| 5TE3_4N4W_ASD05688001 | 1 | 1.011  | 1.66 | 2  | SNT | 4.07 |
| 5TE5_4N4W_ASD02820003 | 9 | 3.013  | 2.25 | 9  | SNT | 4.33 |
| 5TE5_4N4W_ASD05688001 | 2 | 2.014  | 3.08 | 7  | SNT | 4.44 |
| 5TE5_4OR2_ASD02820003 | 5 | 3.013  | 1.58 | 4  | FM9 | 2.30 |
| 5TE5_4OR2_ASD05688001 | 3 | 3.013  | 2.23 | 10 | FM9 | 2.49 |
| 5TGZ_4MBS_ASD03331126 | 6 | 0.019  | 2.18 | 4  | MRV | 0.97 |

|                       |    |       |      |    |              |       |
|-----------------------|----|-------|------|----|--------------|-------|
| 5TGZ_4MBS_ASD03331623 | 7  | 0.019 | 1.82 | 2  | MRV          | 1.40  |
| 5U09_3OE0_ASD03331126 | 1  | 1.019 | 2.27 | 5  | PRD- chain I | 10.57 |
| 5U09_3OE0_ASD03331623 | 9  | 1.019 | 3.57 | 7  | PRD- chain I | 11.92 |
| 5U09_4N4W_ASD03331126 | 3  | 1.019 | 2.49 | 6  | SNT          | 4.65  |
| 5U09_4N4W_ASD03331623 | 3  | 1.019 | 3.74 | 5  | SNT          | 4.03  |
| 5UEN_3ODU_ASD00170496 | 4  | 8.002 | 0.83 | 9  | ITD          | 1.23  |
| 5UEN_3ODU_ASD00170902 |    |       |      |    |              |       |
| 5UEN_5L7I_ASD00170496 | 3  | 8.002 | 0.78 | 10 | VIS          | 4.88  |
| 5UEN_5L7I_ASD00170902 |    |       |      |    |              |       |
| 5UEN_5NDD_ASD00170496 | 9  | 8.002 | 1.03 | 2  | 8TZ          | 0.58  |
| 5UEN_5NDD_ASD00170902 |    |       |      |    |              |       |
| 5VEW_4MBS_ASD01180443 | 10 | 0.027 | 0.92 | 4  | MRV          | 6.57  |
| 5VEW_4N4W_ASD01180443 | 8  | 0.027 | 0.52 | 5  | SNT          | 5.97  |
| 5VEX_4OO9_ASD01180443 | 1  | 9.002 | 0.60 | 10 | 2U8          | 1.72  |
| 5VEX_5TZR_ASD01180443 | 9  | 1.014 | 0.59 | 1  | MK6          | 3.49  |
| 5WIU_4MBS_ASD00170350 | 9  | 1.013 | 1.25 | 8  | MRV          | 0.75  |
| 5WIU_5NDD_ASD00170350 | 1  | 0.015 | 1.28 | 6  | 8TZ          | 2.22  |
| 5WIV_4MBS_ASD00170350 | 2  | 1.014 | 1.15 | 9  | MRV          | 1.52  |
| 5WIV_5NDD_ASD00170350 | 10 | 1.014 | 0.91 | 1  | 8TZ          | 1.65  |
| 5WKT_4MBS_ASD02820003 | 5  | 4.01  | 0.62 | 10 | MRV          | 2.71  |
| 5WKT_4MBS_ASD05688001 | 9  | 4.01  | 0.72 | 3  | MRV          | 2.72  |
| 5WKT_4N4W_ASD02820003 | 9  | 3.011 | 1.58 | 10 | SNT          | 3.49  |
| 5WKT_4N4W_ASD05688001 | 1  | 0.023 | 1.97 | 1  | SNT          | 3.66  |
| 5XEZ_4MBS_ASD04910208 | 5  | 1.018 | 0.24 | 6  | MRV          | 3.80  |
| 5XEZ_5NDD_ASD04910208 | 5  | 0.027 | 0.14 | 8  | 8TZ          | 1.51  |
| 5XEZ_6LI0_ASD04910208 | 7  | 2.016 | 1.38 | 5  | D7W          | 3.02  |
| 5XF1_3OE0_ASD04910208 | 6  | 4.007 | 0.28 | 9  | PRD- chain I | 8.26  |
| 5XF1_4N4W_ASD04910208 | 3  | 1.018 | 1.56 | 5  | SNT          | 5.45  |
| 5XF1_5NDD_ASD04910208 | 4  | 2.016 | 0.65 | 3  | 8TZ          | 1.69  |
| 5XF1_5TZR_ASD04910208 | 10 | 1.018 | 0.39 | 10 | MK6          | 11.88 |
| 5XF1_6LI0_ASD04910208 | 5  | 0.018 | 0.32 | 1  | D7W          | 3.41  |
| 5XR8_3OE0_ASD03331126 | 8  | 1.015 | 2.85 | 1  | PRD- chain I | 11.08 |
| 5XR8_3OE0_ASD03331623 | 4  | 1.015 | 3.03 | 10 | PRD- chain I | 10.89 |
| 5XR8_3OE0_ASD03331727 | 3  | 2.013 | 2.83 | 8  | PRD- chain I | 12.16 |

|                       |    |       |       |    |              |        |
|-----------------------|----|-------|-------|----|--------------|--------|
| 5XR8_4N4W_ASD03331126 | 1  | 1.015 | 2.11  | 3  | SNT          | 3.75   |
| 5XR8_4N4W_ASD03331623 | 10 | 1.015 | 2.14  | 6  | SNT          | 4.05   |
| 5XR8_4N4W_ASD03331727 | 10 | 1.015 | 2.07  | 7  | SNT          | 3.77   |
| 5XR8_5NDD_ASD03331126 | 6  | 1.015 | 2.20  | 2  | 8TZ          | 1.68   |
| 5XR8_5NDD_ASD03331623 | 5  | 1.015 | 1.74  | 5  | 8TZ          | 1.56   |
| 5XR8_5NDD_ASD03331727 | 6  | 1.015 | 2.82  | 6  | 8TZ          | 1.92   |
| 5XR8_6LI0_ASD03331126 | 7  | 2.013 | 2.05  | 7  | D7W          | 5.01   |
| 5XR8_6LI0_ASD03331623 | 3  | 2.013 | 2.08  | 5  | D7W          | 5.44   |
| 5XR8_6LI0_ASD03331727 | 5  | 2.013 | 2.20  | 5  | D7W          | 4.91   |
| 5XRA_3OE0_ASD03331126 | 3  | 3.011 | 2.98  | 9  | PRD- chain I | 11.74  |
| 5XRA_3OE0_ASD03331623 | 8  | 1.016 | 2.74  | 3  | PRD- chain I | 10.80  |
| 5XRA_3OE0_ASD03331727 | 7  | 3.011 | 1.89  | 10 | PRD- chain I | 10.80  |
| 5XRA_4N4W_ASD03331126 | 9  | 3.011 | 2.79  | 7  | SNT          | 3.64   |
| 5XRA_4N4W_ASD03331623 | 10 | 1.016 | 2.01  | 3  | SNT          | 4.26   |
| 5XRA_4N4W_ASD03331727 | 4  | 1.016 | 3.75  | 6  | SNT          | 4.16   |
| 5XRA_5NDD_ASD03331126 | 2  | 1.016 | 2.31  | 5  | 8TZ          | 1.75   |
| 5XRA_5NDD_ASD03331623 | 1  | 1.016 | 2.22  | 8  | 8TZ          | 2.12   |
| 5XRA_5NDD_ASD03331727 | 9  | 1.016 | 1.90  | 5  | 8TZ          | 2.26   |
| 5XRA_6LI0_ASD03331126 | 3  | 2.012 | 2.43  | 2  | D7W          | 4.98   |
| 5XRA_6LI0_ASD03331623 | 2  | 2.012 | 1.95  | 2  | D7W          | 4.88   |
| 5XRA_6LI0_ASD03331727 | 2  | 2.012 | 2.40  | 3  | D7W          | 4.23   |
| 5YQZ_4K5Y_ASD04910208 | 1  | 2.018 | 0.69  | 2  | 1Q5          | 1.96   |
| 5YQZ_4O09_ASD04910208 | 8  | 3.016 | 0.39  | 9  | 2U8          | 4.31   |
| 5YQZ_4OR2_ASD04910208 | 4  | 0.018 | 0.61  | 9  | FM9          | 3.46   |
| 5YQZ_5NDD_ASD04910208 | 6  | 1.018 | 0.38  | 7  | 8TZ          | 1.27   |
| 5ZTY_3OE0_ASD01150307 | 4  | 7.005 | 90.72 | 4  | PRD          | 121.08 |
| 5ZTY_3OE0_ASD03331798 | 4  | 7.005 | 91.16 | 4  | PRD          | 121.65 |
| 5ZTY_3OE0_ASD11730002 | 3  | 7.005 | 88.93 | 3  | PRD          | 119.38 |
| 5ZTY_5NDD_ASD01150307 | 8  | 7.005 | 90.54 | 8  | 8TZ          | 110.23 |
| 5ZTY_5NDD_ASD03331798 | 4  | 7.005 | 91.61 | 4  | 8TZ          | 111.45 |
| 5ZTY_5NDD_ASD11730002 | 9  | 7.005 | 89.30 | 9  | 8TZ          | 108.60 |
| 6AKX_4MBS_ASD00601006 | 2  | 8.002 | 1.94  | 7  | MRV          | 1.98   |
| 6AKX_4MBS_ASD00601007 | 3  | 1.018 | 1.97  | 8  | MRV          | 2.68   |
| 6AKX_4MBS_ASD03570003 | 1  | 8.002 | 1.80  | 5  | MRV          | 0.77   |

|                       |    |       |      |    |     |      |
|-----------------------|----|-------|------|----|-----|------|
| 6AKX_4N4W_ASD00601006 | 5  | 1.018 | 1.51 | 4  | SNT | 5.98 |
| 6AKX_4N4W_ASD00601007 | 6  | 1.018 | 1.82 | 10 | SNT | 5.44 |
| 6AKX_4N4W_ASD03570003 | 4  | 1.018 | 2.99 | 5  | SNT | 3.68 |
| 6AKX_5NDD_ASD00601006 | 8  | 8.002 | 1.68 | 10 | 8TZ | 1.07 |
| 6AKX_5NDD_ASD00601007 | 7  | 8.002 | 2.21 | 10 | 8TZ | 0.68 |
| 6AKX_5NDD_ASD03570003 | 3  | 8.002 | 2.73 | 2  | 8TZ | 1.15 |
| 6AKX_6LI0_ASD00601006 | 1  | 1.018 | 1.97 | 7  | D7W | 4.92 |
| 6AKX_6LI0_ASD00601007 | 5  | 1.018 | 2.48 | 8  | D7W | 5.20 |
| 6AKX_6LI0_ASD03570003 | 3  | 1.018 | 3.19 | 2  | D7W | 5.96 |
| 6AKY_4MBS_ASD00601006 | 2  | 4.012 | 1.58 | 8  | MRV | 2.43 |
| 6AKY_4MBS_ASD00601007 | 4  | 4.012 | 1.97 | 6  | MRV | 2.21 |
| 6AKY_4MBS_ASD03570003 | 1  | 4.012 | 1.79 | 4  | MRV | 1.32 |
| 6AKY_4N4W_ASD00601006 | 2  | 3.014 | 2.05 | 9  | SNT | 3.79 |
| 6AKY_4N4W_ASD00601007 | 4  | 3.014 | 1.86 | 7  | SNT | 3.68 |
| 6AKY_4N4W_ASD03570003 | 6  | 8.001 | 2.70 | 1  | SNT | 2.82 |
| 6AKY_5NDD_ASD00601006 | 1  | 0.019 | 2.56 | 8  | 8TZ | 0.91 |
| 6AKY_5NDD_ASD00601007 | 8  | 4.012 | 2.19 | 2  | 8TZ | 1.09 |
| 6AKY_5NDD_ASD03570003 | 10 | 4.012 | 3.40 | 1  | 8TZ | 1.86 |
| 6AKY_6LI0_ASD00601006 | 1  | 3.014 | 2.20 | 5  | D7W | 5.15 |
| 6AKY_6LI0_ASD00601007 | 4  | 3.014 | 2.32 | 3  | D7W | 5.28 |
| 6AKY_6LI0_ASD03570003 | 2  | 3.014 | 3.26 | 5  | D7W | 5.96 |
| 6B73_4N4W_ASD00170299 | 5  | 6.007 | 1.76 | 3  | SNT | 1.85 |
| 6B73_4N4W_ASD03170003 | 2  | 6.007 | 2.14 | 2  | SNT | 2.54 |
| 6B73_4N4W_ASD03170006 | 5  | 6.007 | 1.59 | 2  | SNT | 2.37 |
| 6B73_4O09_ASD00170299 | 5  | 6.007 | 1.87 | 1  | 2U8 | 2.01 |
| 6B73_4O09_ASD03170003 | 3  | 6.007 | 1.65 | 2  | 2U8 | 2.74 |
| 6B73_4O09_ASD03170006 | 2  | 6.007 | 1.50 | 1  | 2U8 | 2.13 |
| 6BQG_4MBS_ASD00110052 | 9  | 0.016 | 2.24 | 9  | MRV | 1.34 |
| 6BQG_4MBS_ASD00111114 | 1  | 2.012 | 2.09 | 8  | MRV | 1.83 |
| 6BQG_4MBS_ASD00111115 | 9  | 4.01  | 1.90 | 5  | MRV | 1.98 |
| 6BQG_4N4W_ASD00110052 | 9  | 0.016 | 2.36 | 3  | SNT | 4.79 |
| 6BQG_4N4W_ASD00111114 | 7  | 0.016 | 2.40 | 2  | SNT | 4.28 |
| 6BQG_4N4W_ASD00111115 | 4  | 0.016 | 1.79 | 9  | SNT | 3.89 |
| 6BQG_5NDD_ASD00110052 | 3  | 0.016 | 2.16 | 6  | 8TZ | 2.46 |

|                       |    |        |      |    |              |       |
|-----------------------|----|--------|------|----|--------------|-------|
| 6BQG_5NDD_ASD00111114 | 10 | 0.016  | 2.38 | 3  | 8TZ          | 1.21  |
| 6BQG_5NDD_ASD00111115 | 7  | 0.016  | 1.54 | 4  | 8TZ          | 2.56  |
| 6BQG_6LI0_ASD00110052 | 9  | 0.016  | 2.36 | 2  | D7W          | 4.38  |
| 6BQG_6LI0_ASD00111114 | 5  | 0.016  | 2.47 | 10 | D7W          | 3.01  |
| 6BQG_6LI0_ASD00111115 | 3  | 0.016  | 2.24 | 1  | D7W          | 4.10  |
| 6BQH_3OE0_ASD00110052 | 7  | 0.018  | 2.16 | 7  | PRD- chain I | 10.01 |
| 6BQH_3OE0_ASD00111114 | 9  | 3.012  | 1.75 | 10 | PRD- chain I | 8.62  |
| 6BQH_3OE0_ASD00111115 | 9  | 3.012  | 2.14 | 1  | PRD- chain I | 9.08  |
| 6BQH_4N4W_ASD00110052 | 7  | 4.01   | 1.33 | 7  | SNT          | 4.25  |
| 6BQH_4N4W_ASD00111114 | 7  | 4.01   | 1.12 | 10 | SNT          | 4.10  |
| 6BQH_4N4W_ASD00111115 | 2  | 7.004  | 1.97 | 3  | SNT          | 5.43  |
| 6BQH_5NDD_ASD00110052 | 10 | 0.018  | 1.83 | 2  | 8TZ          | 2.75  |
| 6BQH_5NDD_ASD00111114 | 5  | 3.012  | 1.60 | 8  | 8TZ          | 1.98  |
| 6BQH_5NDD_ASD00111115 | 8  | 3.012  | 1.75 | 2  | 8TZ          | 2.06  |
| 6C1Q_4MBS_ASD03160012 | 8  | 3.014  | 3.58 | 10 | MRV          | 3.15  |
| 6C1Q_4MBS_ASD11780002 | 5  | 2.017  | 3.94 | 2  | MRV          | 3.57  |
| 6C1Q_5NDD_ASD03160012 | 6  | 2.017  | 3.95 | 2  | 8TZ          | 3.12  |
| 6C1Q_5NDD_ASD11780002 | 5  | 0.017  | 4.02 | 7  | 8TZ          | 3.26  |
| 6C1Q_6LI0_ASD03160012 | 1  | 2.017  | 3.06 | 1  | D7W          | 7.30  |
| 6C1Q_6LI0_ASD11780002 | 1  | 2.017  | 1.81 | 1  | D7W          | 8.48  |
| 6C1R_4MBS_ASD03160012 | 5  | 12.002 | 1.68 | 8  | MRV          | 1.99  |
| 6C1R_4MBS_ASD11780002 | 6  | 12.002 | 0.55 | 2  | MRV          | 3.06  |
| 6C1R_5NDD_ASD03160012 | 2  | 12.002 | 0.62 | 4  | 8TZ          | 2.63  |
| 6C1R_5NDD_ASD11780002 | 1  | 12.002 | 0.46 | 9  | 8TZ          | 2.44  |
| 6CM4_4N4W_ASD00990001 | 4  | 1.016  | 0.59 | 9  | SNT          | 3.93  |
| 6CM4_4N4W_ASD00990027 | 10 | 4.01   | 1.16 | 1  | SNT          | 2.66  |
| 6CM4_4N4W_ASD00990028 | 8  | 4.01   | 1.17 | 9  | SNT          | 2.80  |
| 6CM4_5NDD_ASD00990001 | 8  | 2.014  | 0.65 | 7  | 8TZ          | 3.14  |
| 6CM4_5NDD_ASD00990027 | 5  | 4.01   | 1.10 | 3  | 8TZ          | 2.32  |
| 6CM4_5NDD_ASD00990028 | 7  | 7.005  | 0.96 | 4  | 8TZ          | 1.69  |
| 6CM4_5UIG_ASD00990001 | 5  | 4.01   | 0.74 | 5  | 8D1          | 5.09  |
| 6CM4_5UIG_ASD00990027 | 7  | 7.005  | 1.29 | 4  | 8D1          | 1.41  |
| 6CM4_5UIG_ASD00990028 | 8  | 4.01   | 1.08 | 7  | 8D1          | 2.52  |
| 6CM4_6LI0_ASD00990001 | 5  | 1.016  | 0.59 | 8  | D7W          | 1.37  |

|                       |    |        |      |    |     |      |
|-----------------------|----|--------|------|----|-----|------|
| 6CM4_6LI0_ASD00990027 | 9  | 4.01   | 1.11 | 7  | D7W | 1.84 |
| 6CM4_6LI0_ASD00990028 | 10 | 1.016  | 0.60 | 6  | D7W | 2.29 |
| 6E59_4MBS_ASD06720001 | 8  | 8.003  | 1.87 | 9  | MRV | 2.37 |
| 6E59_4N4W_ASD06720001 | 4  | 8.003  | 1.89 | 5  | SNT | 4.62 |
| 6E67_4MBS_ASD01580008 | 2  | 0.023  | 0.62 | 6  | MRV | 4.79 |
| 6E67_4MBS_ASD03130018 | 2  | 8.002  | 2.08 | 5  | MRV | 1.44 |
| 6E67_4MBS_ASD03130023 | 3  | 8.002  | 1.86 | 4  | MRV | 1.82 |
| 6E67_5NDD_ASD01580008 | 3  | 8.002  | 0.26 | 10 | 8TZ | 0.35 |
| 6E67_5NDD_ASD03130018 | 1  | 8.002  | 1.93 | 3  | 8TZ | 2.35 |
| 6E67_5NDD_ASD03130023 | 3  | 8.002  | 2.24 | 3  | 8TZ | 2.85 |
| 6FK6_4N4W_ASD02820003 | 2  | 8.003  | 1.33 | 9  | SNT | 2.61 |
| 6FK6_4N4W_ASD05688001 | 10 | 8.003  | 2.05 | 5  | SNT | 3.18 |
| 6FK6_4OR2_ASD02820003 | 3  | 0.019  | 1.97 | 9  | FM9 | 1.50 |
| 6FK6_4OR2_ASD05688001 | 2  | 0.019  | 2.14 | 8  | FM9 | 1.78 |
| 6FK7_4N4W_ASD02820003 | 2  | 5.009  | 1.63 | 6  | SNT | 2.76 |
| 6FK7_4N4W_ASD05688001 | 7  | 7.005  | 1.86 | 8  | SNT | 3.75 |
| 6FK7_4OO9_ASD02820003 | 9  | 6.006  | 1.93 | 4  | 2U8 | 3.18 |
| 6FK7_4OO9_ASD05688001 | 6  | 7.005  | 1.78 | 5  | 2U8 | 4.27 |
| 6FK8_4N4W_ASD02820003 | 6  | 2.011  | 2.51 | 2  | SNT | 2.91 |
| 6FK8_4N4W_ASD05688001 | 1  | 1.015  | 2.42 | 2  | SNT | 2.60 |
| 6FK8_4OO9_ASD02820003 | 1  | 1.015  | 1.69 | 3  | 2U8 | 3.48 |
| 6FK8_4OO9_ASD05688001 | 7  | 1.015  | 2.22 | 9  | 2U8 | 3.79 |
| 6FK9_4N4W_ASD02820003 | 9  | 2.011  | 1.80 | 3  | SNT | 2.39 |
| 6FK9_4N4W_ASD05688001 | 5  | 2.011  | 2.32 | 6  | SNT | 3.46 |
| 6FK9_4OR2_ASD02820003 | 5  | 2.011  | 2.12 | 5  | FM9 | 2.12 |
| 6FK9_4OR2_ASD05688001 | 3  | 0.022  | 2.49 | 9  | FM9 | 1.73 |
| 6FKA_4K5Y_ASD02820003 | 3  | 2.012  | 1.60 | 2  | 1Q5 | 6.60 |
| 6FKA_4K5Y_ASD05688001 | 1  | 2.012  | 1.55 | 1  | 1Q5 | 8.06 |
| 6FKA_4N4W_ASD02820003 | 2  | 10.004 | 1.12 | 9  | SNT | 3.06 |
| 6FKA_4N4W_ASD05688001 | 4  | 5.006  | 2.21 | 8  | SNT | 3.45 |
| 6FKA_4OO9_ASD02820003 | 2  | 1.013  | 1.73 | 6  | 2U8 | 2.62 |
| 6FKA_4OO9_ASD05688001 | 7  | 11.003 | 0.86 | 5  | 2U8 | 3.74 |
| 6FKB_4MBS_ASD02820003 | 1  | 4.008  | 1.53 | 8  | MRV | 4.08 |
| 6FKB_4MBS_ASD05688001 | 7  | 7.005  | 2.56 | 9  | MRV | 3.77 |

|                       |   |        |       |    |     |        |
|-----------------------|---|--------|-------|----|-----|--------|
| 6FKB_4N4W_ASD02820003 | 1 | 4.008  | 1.53  | 2  | SNT | 3.51   |
| 6FKB_4N4W_ASD05688001 | 8 | 7.005  | 2.52  | 6  | SNT | 2.07   |
| 6FKC_4N4W_ASD02820003 | 3 | 6.008  | 2.67  | 5  | SNT | 2.80   |
| 6FKC_4N4W_ASD05688001 | 2 | 7.006  | 2.26  | 4  | SNT | 3.31   |
| 6FKC_4OR2_ASD02820003 | 8 | 7.006  | 2.76  | 8  | FM9 | 3.35   |
| 6FKC_4OR2_ASD05688001 | 4 | 7.006  | 2.11  | 4  | FM9 | 2.31   |
| 6FKD_4N4W_ASD02820003 | 1 | 6.008  | 1.71  | 5  | SNT | 2.72   |
| 6FKD_4N4W_ASD05688001 | 5 | 4.01   | 2.14  | 9  | SNT | 3.09   |
| 6FKD_4OO9_ASD02820003 | 1 | 6.008  | 1.35  | 3  | 2U8 | 3.39   |
| 6FKD_4OO9_ASD05688001 | 1 | 6.008  | 1.72  | 2  | 2U8 | 4.57   |
| 6FUF_4MBS_ASD02820003 | 8 | 2.017  | 1.69  | 8  | MRV | 3.51   |
| 6FUF_4MBS_ASD05688001 | 4 | 2.017  | 1.65  | 6  | MRV | 3.38   |
| 6FUF_4N4W_ASD02820003 | 6 | 4.006  | 1.15  | 10 | SNT | 3.18   |
| 6FUF_4N4W_ASD05688001 | 3 | 1.017  | 1.70  | 3  | SNT | 3.21   |
| 6GPS_4MBS_ASD10910002 | 3 | 2.013  | 2.54  | 6  | MRV | 5.01   |
| 6GPS_5NDD_ASD10910002 | 9 | 2.013  | 2.13  | 1  | 8TZ | 1.40   |
| 6GPS_6LI0_ASD10910002 | 1 | 5.007  | 1.29  | 3  | D7W | 7.73   |
| 6GPX_4MBS_ASD10910002 | 1 | 1.015  | 2.07  | 6  | MRV | 3.45   |
| 6GPX_5NDD_ASD10910002 | 1 | 1.015  | 2.08  | 1  | 8TZ | 1.73   |
| 6GPX_6LI0_ASD10910002 | 1 | 10.003 | 1.13  | 5  | D7W | 7.84   |
| 6GT3_4MBS_ASD00180010 | 7 | 1.015  | 1.93  | 6  | MRV | 2.27   |
| 6GT3_4MBS_ASD00180044 | 5 | 8.004  | 2.12  | 5  | MRV | 1.25   |
| 6GT3_4MBS_ASD03130013 | 2 | 8.004  | 2.23  | 5  | MRV | 1.63   |
| 6GT3_4N4W_ASD00180010 | 3 | 1.015  | 2.15  | 5  | SNT | 2.49   |
| 6GT3_4N4W_ASD00180044 | 4 | 8.004  | 2.10  | 7  | SNT | 2.95   |
| 6GT3_4N4W_ASD03130013 | 1 | 8.004  | 2.43  | 2  | SNT | 4.21   |
| 6GT3_5LWE_ASD00180010 | 7 | 0.018  | 2.15  | 1  | 79K | 2.88   |
| 6GT3_5LWE_ASD00180044 | 1 | 0.018  | 1.36  | 2  | 79K | 2.87   |
| 6GT3_5LWE_ASD03130013 | 2 | 0.018  | 3.10  | 2  | 79K | 3.33   |
| 6GT3_5NDD_ASD00180010 | 3 | 1.015  | 2.21  | 8  | 8TZ | 0.83   |
| 6GT3_5NDD_ASD00180044 | 7 | 8.004  | 2.47  | 3  | 8TZ | 0.86   |
| 6GT3_5NDD_ASD03130013 | 5 | 2.011  | 2.86  | 3  | 8TZ | 1.13   |
| 6HLL_4MBS_ASD06720001 | 1 | 3.013  | 74.34 | 1  | MRV | 105.06 |
| 6HLL_4N4W_ASD06720001 | 2 | 3.013  | 73.02 | 2  | SNT | 100.41 |



|                       |    |        |        |    |     |        |
|-----------------------|----|--------|--------|----|-----|--------|
| 6HLL_5NDD_ASD06720001 | 5  | 3.013  | 77.01  | 5  | 8TZ | 108.15 |
| 6HLO_3OE0_ASD06720001 | 8  | 6.006  | 3.55   | 10 | PRD | 7.50   |
| 6HLO_4N4W_ASD06720001 | 2  | 0.017  | 2.47   | 2  | SNT | 5.17   |
| 6HLO_5NDD_ASD06720001 | 5  | 0.017  | 2.06   | 4  | 8TZ | 4.33   |
| 6HLP_4MBS_ASD06720001 | 2  | 2.017  | 2.68   | 2  | MRV | 1.44   |
| 6HLP_4N4W_ASD06720001 | 2  | 2.017  | 2.65   | 2  | SNT | 4.73   |
| 6HLP_4PHU_ASD06720001 | 6  | 1.022  | 3.06   | 3  | 2YB | 11.77  |
| 6HLP_5NDD_ASD06720001 | 1  | 2.017  | 2.46   | 6  | 8TZ | 5.15   |
| 6J20_4MBS_ASD06720001 | 9  | 6.008  | 280.19 | 9  | MRV | 299.82 |
| 6J20_4N4W_ASD06720001 | 2  | 6.008  | 276.74 | 2  | SNT | 292.65 |
| 6J20_5NDD_ASD06720001 | 1  | 6.008  | 277.88 | 1  | 8TZ | 297.81 |
| 6J21_4MBS_ASD06720001 | 4  | 3.015  | 193.28 | 4  | MRV | 197.63 |
| 6J21_4N4W_ASD06720001 | 7  | 3.015  | 195.65 | 7  | SNT | 196.88 |
| 6JZH_3OE0_ASD00180010 | 3  | 14.001 | 1.25   | 6  | PRD | 11.17  |
| 6JZH_3OE0_ASD00180044 | 4  | 14.001 | 1.16   | 10 | PRD | 9.96   |
| 6JZH_3OE0_ASD03130013 | 4  | 0.017  | 1.51   | 6  | PRD | 8.91   |
| 6KJV_4MBS_ASD01180443 | 5  | 5.009  | 0.68   | 7  | MRV | 5.90   |
| 6KJV_4N4W_ASD01180443 | 5  | 2.013  | 0.47   | 9  | SNT | 1.78   |
| 6KJV_5NDD_ASD01180443 | 7  | 2.013  | 0.48   | 8  | 8TZ | 4.16   |
| 6KK1_4N4W_ASD01180443 | 6  | 0.014  | 0.32   | 6  | SNT | 2.72   |
| 6KK1_4OR2_ASD01180443 | 2  | 1.013  | 0.91   | 3  | FM9 | 3.04   |
| 6KK7_3OE0_ASD01180443 | 4  | 10.002 | 75.42  | 4  | PRD | 117.05 |
| 6KK7_4N4W_ASD01180443 | 1  | 10.002 | 71.86  | 1  | SNT | 102.05 |
| 6KP6_4MBS_ASD01840213 | 10 | 5.005  | 89.83  | 10 | MRV | 118.88 |
| 6KP6_4MBS_ASD01841006 | 7  | 5.005  | 86.55  | 7  | MRV | 115.66 |
| 6KP6_4MBS_ASD01914813 | 7  | 5.005  | 85.87  | 7  | MRV | 115.43 |
| 6KP6_4N4W_ASD01840213 | 5  | 5.005  | 85.44  | 5  | SNT | 112.26 |
| 6KP6_4N4W_ASD01841006 | 7  | 5.005  | 81.65  | 7  | SNT | 108.18 |
| 6KP6_4N4W_ASD01914813 | 4  | 5.005  | 79.95  | 4  | SNT | 106.33 |
| 6KP6_5NDD_ASD01840213 | 5  | 5.005  | 90.08  | 5  | 8TZ | 120.35 |
| 6KP6_5NDD_ASD01841006 | 3  | 5.005  | 91.52  | 3  | 8TZ | 121.87 |
| 6KP6_5NDD_ASD01914813 | 9  | 5.005  | 90.66  | 9  | 8TZ | 121.10 |
| 6KPC_3OE0_ASD01150307 | 5  | 4.009  | 65.98  | 5  | PRD | 99.15  |
| 6KPC_3OE0_ASD03331798 | 2  | 4.009  | 67.28  | 2  | PRD | 99.63  |

|                       |    |       |       |    |     |       |
|-----------------------|----|-------|-------|----|-----|-------|
| 6KPC_3OE0_ASD11730002 | 7  | 4.009 | 65.14 | 7  | PRD | 98.44 |
| 6KPC_5NDD_ASD01150307 | 9  | 4.009 | 65.32 | 9  | 8TZ | 87.51 |
| 6KPC_5NDD_ASD03331798 | 4  | 4.009 | 64.49 | 4  | 8TZ | 86.50 |
| 6KPC_5NDD_ASD11730002 | 1  | 4.009 | 64.97 | 1  | 8TZ | 86.76 |
| 6KQI_3OE0_ASD03331126 | 3  | 0.019 | 1.91  | 3  | PRD | 10.07 |
| 6KQI_3OE0_ASD03331623 | 7  | 1.012 | 3.27  | 9  | PRD | 10.21 |
| 6KQI_3OE0_ASD03331727 | 9  | 0.019 | 2.65  | 3  | PRD | 10.08 |
| 6KQI_4N4W_ASD03331126 | 2  | 0.019 | 2.32  | 9  | SNT | 4.28  |
| 6KQI_4N4W_ASD03331623 | 10 | 0.019 | 3.63  | 7  | SNT | 4.38  |
| 6KQI_4N4W_ASD03331727 | 1  | 0.019 | 3.54  | 9  | SNT | 4.37  |
| 6KUX_3OE0_ASD00170351 | 6  | 0.02  | 31.75 | 6  | PRD | 26.68 |
| 6KUX_3OE0_ASD03050002 | 5  | 0.02  | 31.51 | 5  | PRD | 26.23 |
| 6KUX_3OE0_ASD03070001 |    |       |       |    |     |       |
| 6KUX_4N4W_ASD00170351 | 1  | 4.009 | 36.91 | 1  | SNT | 47.14 |
| 6KUX_4N4W_ASD03050002 | 4  | 0.02  | 37.81 | 4  | SNT | 48.26 |
| 6KUX_4N4W_ASD03070001 |    |       |       |    |     |       |
| 6KUX_5NDD_ASD00170351 | 6  | 4.009 | 34.41 | 6  | 8TZ | 38.19 |
| 6KUX_5NDD_ASD03050002 | 7  | 4.009 | 32.84 | 7  | 8TZ | 36.67 |
| 6KUX_5NDD_ASD03070001 |    |       |       |    |     |       |
| 6KUY_4MBS_ASD00170351 | 10 | 2.016 | 1.72  | 7  | MRV | 1.35  |
| 6KUY_4MBS_ASD03050002 | 5  | 2.016 | 2.18  | 4  | MRV | 1.43  |
| 6KUY_4MBS_ASD03070001 |    |       |       |    |     |       |
| 6KUY_4N4W_ASD00170351 | 10 | 0.019 | 2.07  | 10 | SNT | 4.29  |
| 6KUY_4N4W_ASD03050002 | 3  | 0.019 | 2.83  | 1  | SNT | 4.50  |
| 6KUY_4N4W_ASD03070001 |    |       |       |    |     |       |
| 6KUY_4PHU_ASD00170351 | 4  | 2.016 | 2.00  | 3  | 2YB | 11.50 |
| 6KUY_4PHU_ASD03050002 | 2  | 2.016 | 1.88  | 2  | 2YB | 11.57 |
| 6KUY_4PHU_ASD03070001 |    |       |       |    |     |       |
| 6LN2_4MBS_ASD01180443 | 8  | 3.011 | 0.46  | 7  | MRV | 4.67  |
| 6LN2_4N4W_ASD01180443 | 5  | 3.011 | 0.50  | 9  | SNT | 3.15  |
| 6LUQ_4MBS_ASD00990001 | 2  | 1.017 | 0.39  | 6  | MRV | 4.78  |
| 6LUQ_4MBS_ASD00990027 | 8  | 1.017 | 0.65  | 4  | MRV | 2.74  |
| 6LUQ_4MBS_ASD00990028 | 4  | 1.017 | 0.74  | 5  | MRV | 1.83  |
| 6LUQ_4N4W_ASD00990001 | 2  | 1.017 | 0.37  | 6  | SNT | 3.86  |

|                       |    |       |       |    |     |       |
|-----------------------|----|-------|-------|----|-----|-------|
| 6LUQ_4N4W_ASD00990027 | 6  | 1.017 | 1.69  | 3  | SNT | 3.01  |
| 6LUQ_4N4W_ASD00990028 | 5  | 1.017 | 0.66  | 6  | SNT | 3.42  |
| 6LUQ_5NDD_ASD00990001 | 5  | 0.017 | 1.82  | 6  | 8TZ | 4.60  |
| 6LUQ_5NDD_ASD00990027 | 2  | 0.017 | 1.64  | 2  | 8TZ | 4.41  |
| 6LUQ_5NDD_ASD00990028 | 5  | 1.017 | 1.80  | 3  | 8TZ | 4.98  |
| 6LUQ_5TZY_ASD00990001 | 8  | 2.014 | 0.71  | 6  | 7OS | 1.75  |
| 6LUQ_5TZY_ASD00990027 | 8  | 6.007 | 1.65  | 1  | 7OS | 1.81  |
| 6LUQ_5TZY_ASD00990028 | 9  | 2.014 | 1.39  | 4  | 7OS | 1.60  |
| 6MH8_3OE0_ASD00180010 | 8  | 0.017 | 0.83  | 4  | PRD | 8.05  |
| 6MH8_3OE0_ASD00180044 | 2  | 0.017 | 1.14  | 9  | PRD | 8.16  |
| 6MH8_3OE0_ASD03130013 | 5  | 2.014 | 2.70  | 2  | PRD | 7.08  |
| 6MH8_4N4W_ASD00180010 | 7  | 0.017 | 1.42  | 10 | SNT | 3.47  |
| 6MH8_4N4W_ASD00180044 | 3  | 0.017 | 1.15  | 6  | SNT | 3.83  |
| 6MH8_4N4W_ASD03130013 | 6  | 0.017 | 2.41  | 3  | SNT | 4.88  |
| 6MH8_5NDD_ASD00180010 | 3  | 3.011 | 2.08  | 2  | 8TZ | 1.02  |
| 6MH8_5NDD_ASD00180044 | 7  | 0.017 | 2.50  | 2  | 8TZ | 1.62  |
| 6MH8_5NDD_ASD03130013 | 2  | 3.011 | 2.91  | 4  | 8TZ | 1.60  |
| 6NWE_4N4W_ASD02820003 | 8  | 9.001 | 2.18  | 9  | SNT | 3.36  |
| 6NWE_4N4W_ASD05688001 | 4  | 6.008 | 2.20  | 4  | SNT | 3.71  |
| 6NWE_4OO9_ASD02820003 | 4  | 0.017 | 1.08  | 7  | 2U8 | 0.33  |
| 6NWE_4OO9_ASD05688001 | 2  | 0.017 | 2.10  | 2  | 2U8 | 0.74  |
| 6OL9_4MBS_ASD01850003 | 9  | 9.002 | 61.17 | 9  | MRV | 68.37 |
| 6OL9_4N4W_ASD01850003 | 1  | 9.002 | 64.21 | 1  | SNT | 74.75 |
| 6PEL_4N4W_ASD02820003 | 5  | 0.018 | 1.26  | 2  | SNT | 3.70  |
| 6PEL_4N4W_ASD05688001 | 3  | 0.018 | 1.15  | 2  | SNT | 4.07  |
| 6PEL_4OO9_ASD02820003 | 1  | 0.018 | 1.41  | 7  | 2U8 | 1.02  |
| 6PEL_4OO9_ASD05688001 | 3  | 0.018 | 1.15  | 2  | 2U8 | 1.53  |
| 6PGS_4MBS_ASD02820003 | 10 | 0.015 | 1.32  | 10 | MRV | 3.78  |
| 6PGS_4MBS_ASD05688001 | 6  | 0.015 | 1.97  | 5  | MRV | 3.07  |
| 6PGS_4N4W_ASD02820003 | 1  | 0.015 | 1.38  | 5  | SNT | 1.90  |
| 6PGS_4N4W_ASD05688001 | 3  | 0.015 | 1.00  | 4  | SNT | 2.42  |
| 6PH7_4MBS_ASD02820003 | 9  | 9.004 | 2.00  | 9  | MRV | 3.73  |
| 6PH7_4MBS_ASD05688001 | 5  | 9.004 | 1.42  | 4  | MRV | 2.87  |
| 6PRZ_3OE0_ASD01580008 | 10 | 6.005 | 0.65  | 9  | PRD | 6.57  |

|                       |    |        |      |    |     |       |
|-----------------------|----|--------|------|----|-----|-------|
| 6PRZ_3OE0_ASD03130018 | 9  | 2.01   | 0.98 | 5  | PRD | 3.39  |
| 6PRZ_3OE0_ASD03130023 | 1  | 2.01   | 1.60 | 2  | PRD | 2.28  |
| 6PS0_4MBS_ASD01580008 | 10 | 1.014  | 0.56 | 2  | MRV | 5.09  |
| 6PS0_4MBS_ASD03130018 | 8  | 12.002 | 2.11 | 6  | MRV | 1.48  |
| 6PS0_4MBS_ASD03130023 | 7  | 12.002 | 1.42 | 1  | MRV | 2.03  |
| 6PS0_5NDD_ASD01580008 | 1  | 0.014  | 1.28 | 1  | 8TZ | 0.75  |
| 6PS0_5NDD_ASD03130018 | 1  | 12.002 | 1.83 | 3  | 8TZ | 1.55  |
| 6PS0_5NDD_ASD03130023 | 2  | 12.002 | 2.07 | 1  | 8TZ | 3.32  |
| 6PS1_4MBS_ASD01580008 | 3  | 7.005  | 0.85 | 2  | MRV | 3.98  |
| 6PS1_4MBS_ASD03130018 | 10 | 6.006  | 1.13 | 5  | MRV | 0.83  |
| 6PS1_4MBS_ASD03130023 | 1  | 6.006  | 2.96 | 1  | MRV | 1.41  |
| 6PS2_3OE0_ASD01580008 | 1  | 5.005  | 0.83 | 9  | PRD | 6.95  |
| 6PS2_3OE0_ASD03130018 | 2  | 1.013  | 1.17 | 5  | PRD | 4.06  |
| 6PS2_3OE0_ASD03130023 | 7  | 12.001 | 1.10 | 6  | PRD | 4.30  |
| 6PS3_4MBS_ASD01580008 | 6  | 2.01   | 1.12 | 3  | MRV | 3.76  |
| 6PS3_4MBS_ASD03130018 | 6  | 4.008  | 1.66 | 5  | MRV | 0.89  |
| 6PS3_4MBS_ASD03130023 | 8  | 6.005  | 2.92 | 8  | MRV | 0.87  |
| 6PS3_4N4W_ASD01580008 | 3  | 1.01   | 0.60 | 3  | SNT | 4.00  |
| 6PS3_4N4W_ASD03130018 | 4  | 6.005  | 2.80 | 4  | SNT | 4.43  |
| 6PS3_4N4W_ASD03130023 | 2  | 10.003 | 3.23 | 4  | SNT | 5.35  |
| 6PS3_5NDD_ASD01580008 | 3  | 0.017  | 1.20 | 3  | 8TZ | 0.64  |
| 6PS3_5NDD_ASD03130018 | 2  | 0.017  | 2.12 | 2  | 8TZ | 1.95  |
| 6PS3_5NDD_ASD03130023 | 4  | 10.003 | 2.79 | 4  | 8TZ | 3.02  |
| 6PS4_3OE0_ASD01580008 | 5  | 0.02   | 0.60 | 4  | PRD | 11.19 |
| 6PS4_3OE0_ASD03130018 | 10 | 4.008  | 1.12 | 10 | PRD | 4.13  |
| 6PS4_3OE0_ASD03130023 | 1  | 0.02   | 3.89 | 2  | PRD | 8.99  |
| 6PS4_5NDD_ASD01580008 | 8  | 0.02   | 0.81 | 9  | 8TZ | 0.84  |
| 6PS4_5NDD_ASD03130018 | 2  | 0.02   | 1.71 | 2  | 8TZ | 1.73  |
| 6PS4_5NDD_ASD03130023 | 3  | 0.02   | 2.80 | 3  | 8TZ | 2.42  |
| 6PS4_6LI0_ASD01580008 | 1  | 3.011  | 0.76 | 1  | D7W | 4.66  |
| 6PS4_6LI0_ASD03130018 |    |        |      |    |     |       |
| 6PS4_6LI0_ASD03130023 | 1  | 3.011  | 0.45 | 1  | D7W | 4.41  |
| 6PS5_4MBS_ASD01580008 | 8  | 0.014  | 0.94 | 5  | MRV | 3.52  |
| 6PS5_4MBS_ASD03130018 | 7  | 8.005  | 2.10 | 1  | MRV | 0.96  |

|                       |    |        |       |    |     |       |
|-----------------------|----|--------|-------|----|-----|-------|
| 6PS5_4MBS_ASD03130023 | 5  | 8.005  | 2.53  | 3  | MRV | 1.47  |
| 6PS5_4N4W_ASD01580008 | 8  | 0.014  | 1.00  | 2  | SNT | 4.83  |
| 6PS5_4N4W_ASD03130018 | 1  | 8.005  | 2.17  | 2  | SNT | 4.16  |
| 6PS5_4N4W_ASD03130023 | 2  | 8.005  | 2.16  | 1  | SNT | 4.06  |
| 6PS5_5NDD_ASD01580008 | 3  | 0.014  | 0.96  | 1  | 8TZ | 1.21  |
| 6PS5_5NDD_ASD03130018 | 1  | 0.014  | 2.63  | 1  | 8TZ | 1.54  |
| 6PS5_5NDD_ASD03130023 | 1  | 0.014  | 3.20  | 1  | 8TZ | 2.35  |
| 6PS6_4MBS_ASD01580008 | 10 | 0.018  | 0.73  | 4  | MRV | 3.88  |
| 6PS6_4MBS_ASD03130018 | 5  | 1.014  | 1.93  | 3  | MRV | 0.50  |
| 6PS6_4MBS_ASD03130023 | 5  | 1.014  | 4.05  | 5  | MRV | 1.38  |
| 6PS6_5NDD_ASD01580008 | 2  | 0.018  | 0.99  | 2  | 8TZ | 0.85  |
| 6PS6_5NDD_ASD03130018 | 1  | 0.018  | 2.18  | 1  | 8TZ | 1.87  |
| 6PS6_5NDD_ASD03130023 | 1  | 0.018  | 3.10  | 1  | 8TZ | 2.91  |
| 6PS7_3OE0_ASD00180010 | 6  | 3.01   | 2.38  | 3  | PRD | 7.88  |
| 6PS7_3OE0_ASD00180044 | 8  | 7.005  | 2.11  | 5  | PRD | 8.79  |
| 6PS7_3OE0_ASD03130013 | 3  | 6.005  | 2.02  | 3  | PRD | 8.02  |
| 6PS7_5KW2_ASD00180010 | 1  | 0.018  | 1.09  | 5  | 6XQ | 5.59  |
| 6PS7_5KW2_ASD00180044 | 1  | 0.018  | 1.67  | 9  | 6XQ | 4.14  |
| 6PS7_5KW2_ASD03130013 | 4  | 5.006  | 3.10  | 4  | 6XQ | 3.05  |
| 6PS7_5NDD_ASD00180010 | 7  | 3.01   | 2.30  | 2  | 8TZ | 1.09  |
| 6PS7_5NDD_ASD00180044 | 10 | 7.005  | 2.08  | 6  | 8TZ | 0.12  |
| 6PS7_5NDD_ASD03130013 | 3  | 3.01   | 2.59  | 5  | 8TZ | 1.44  |
| 6PT2_4N4W_ASD03180043 | 5  | 8.002  | 51.95 | 5  | SNT | 65.99 |
| 6PT2_4N4W_ASD16020002 | 10 | 8.002  | 52.29 | 10 | SNT | 66.02 |
| 6PT2_4OO9_ASD03180043 | 5  | 8.002  | 56.57 | 5  | 2U8 | 69.75 |
| 6PT2_4OO9_ASD16020002 | 4  | 8.002  | 54.41 | 4  | 2U8 | 67.61 |
| 6PT3_4N4W_ASD03180043 | 8  | 2.01   | 64.58 | 8  | SNT | 86.54 |
| 6PT3_4N4W_ASD16020002 | 9  | 2.01   | 63.94 | 9  | SNT | 85.90 |
| 6PT3_4OO9_ASD03180043 | 1  | 2.01   | 63.67 | 1  | 2U8 | 85.80 |
| 6PT3_4OO9_ASD16020002 | 4  | 2.01   | 63.29 | 4  | 2U8 | 85.73 |
| 6RZ4_3OE0_ASD01883993 | 1  | 0.015  | 2.20  | 8  | PRD | 7.39  |
| 6RZ4_3OE0_ASD01885005 | 1  | 0.015  | 2.20  | 10 | PRD | 7.13  |
| 6RZ4_3OE0_ASD01885006 | 6  | 10.004 | 2.58  | 6  | PRD | 7.79  |
| 6RZ4_4N4W_ASD01883993 | 7  | 5.006  | 1.55  | 6  | SNT | 4.57  |

|                       |    |       |       |    |     |       |
|-----------------------|----|-------|-------|----|-----|-------|
| 6RZ4_4N4W_ASD01885005 | 8  | 5.006 | 1.47  | 4  | SNT | 4.55  |
| 6RZ4_4N4W_ASD01885006 | 5  | 5.006 | 1.31  | 10 | SNT | 5.23  |
| 6RZ5_3OE0_ASD01883993 | 2  | 8.002 | 16.75 | 2  | PRD | 47.23 |
| 6RZ5_3OE0_ASD01885005 | 1  | 8.002 | 16.33 | 1  | PRD | 46.93 |
| 6RZ5_3OE0_ASD01885006 | 8  | 8.002 | 17.05 | 4  | PRD | 46.47 |
| 6RZ5_4N4W_ASD01883993 | 1  | 8.002 | 17.48 | 3  | SNT | 35.02 |
| 6RZ5_4N4W_ASD01885005 | 2  | 8.002 | 17.40 | 4  | SNT | 34.99 |
| 6RZ5_4N4W_ASD01885006 | 3  | 8.002 | 17.34 | 7  | SNT | 34.85 |
| 6RZ5_5TZY_ASD01883993 | 2  | 8.002 | 2.44  | 1  | 7OS | 1.79  |
| 6RZ5_5TZY_ASD01885005 | 8  | 3.011 | 1.91  | 1  | 7OS | 2.01  |
| 6RZ5_5TZY_ASD01885006 | 2  | 3.011 | 1.71  | 4  | 7OS | 1.78  |
| 6S0Q_3ODU_ASD00180010 | 5  | 8.004 | 87.83 | 5  | ITD | 96.52 |
| 6S0Q_3ODU_ASD00180044 | 4  | 8.004 | 87.98 | 4  | ITD | 97.54 |
| 6S0Q_3ODU_ASD03130013 | 9  | 8.004 | 88.60 | 9  | ITD | 97.31 |
| 6S0Q_5LWE_ASD00180010 | 1  | 8.004 | 82.44 | 1  | 79K | 97.36 |
| 6S0Q_5LWE_ASD00180044 | 7  | 8.004 | 83.44 | 7  | 79K | 98.80 |
| 6S0Q_5LWE_ASD03130013 | 4  | 8.004 | 83.29 | 4  | 79K | 98.43 |
| 6S0Q_5TZY_ASD00180010 | 1  | 8.004 | 97.49 | 1  | 7OS | 97.78 |
| 6S0Q_5TZY_ASD00180044 | 10 | 8.004 | 97.59 | 10 | 7OS | 97.91 |
| 6S0Q_5TZY_ASD03130013 | 1  | 8.004 | 97.28 | 1  | 7OS | 97.59 |
| 6VI4_4MBS_ASD00170299 | 6  | 3.009 | 11.95 | 2  | MRV | 19.22 |
| 6VI4_4MBS_ASD03170003 | 10 | 3.009 | 12.02 | 6  | MRV | 19.43 |
| 6VI4_4MBS_ASD03170006 | 9  | 3.009 | 12.58 | 1  | MRV | 19.42 |
| 6VI4_5NDD_ASD00170299 | 10 | 3.009 | 22.44 | 10 | 8TZ | 34.86 |
| 6VI4_5NDD_ASD03170003 | 9  | 3.009 | 24.96 | 9  | 8TZ | 37.23 |
| 6VI4_5NDD_ASD03170006 | 9  | 3.009 | 24.15 | 9  | 8TZ | 36.63 |
| 6W25_4MBS_ASD05140009 | 9  | 1.011 | 14.44 | 9  | MRV | 21.14 |
| 6W25_4MBS_ASD05143009 | 3  | 1.011 | 14.24 | 3  | MRV | 20.49 |
| 6W25_4MBS_ASD05143011 | 2  | 1.011 | 14.21 | 2  | MRV | 20.09 |
| 6W25_4N4W_ASD05140009 | 10 | 1.011 | 93.90 | 10 | SNT | 99.88 |
| 6W25_4N4W_ASD05143009 | 10 | 1.011 | 93.91 | 10 | SNT | 99.82 |
| 6W25_4N4W_ASD05143011 | 9  | 1.011 | 92.31 | 9  | SNT | 98.19 |
| 6W25_5NDD_ASD05140009 | 5  | 1.011 | 15.51 | 5  | 8TZ | 17.55 |
| 6W25_5NDD_ASD05143009 | 1  | 1.011 | 14.30 | 1  | 8TZ | 16.09 |

|                       |   |       |       |    |     |       |
|-----------------------|---|-------|-------|----|-----|-------|
| 6W25_5NDD_ASD05143011 | 2 | 1.011 | 14.27 | 2  | 8TZ | 15.93 |
| 6W25_5TZR_ASD05140009 | 1 | 1.011 | 93.24 | 1  | MK6 | 90.04 |
| 6W25_5TZR_ASD05143009 | 8 | 1.011 | 92.87 | 4  | MK6 | 89.99 |
| 6W25_5TZR_ASD05143011 | 1 | 1.011 | 92.31 | 1  | MK6 | 88.93 |
| 6WJC_3OE0_ASD01810375 | 7 | 3.012 | 1.90  | 8  | PRD | 8.53  |
| 6WJC_3OE0_ASD01810699 | 6 | 1.017 | 0.43  | 6  | PRD | 13.23 |
| 6WJC_3OE0_ASD01811561 | 6 | 1.017 | 0.84  | 10 | PRD | 9.51  |
| 6WJC_4MQT_ASD01810375 | 1 | 3.012 | 1.90  | 3  | 2CU | 4.69  |
| 6WJC_4MQT_ASD01810699 | 7 | 6.005 | 0.63  | 10 | 2CU | 4.94  |
| 6WJC_4MQT_ASD01811561 | 6 | 6.005 | 1.07  | 6  | 2CU | 5.00  |
| 6WJC_4N4W_ASD01810375 | 3 | 5.008 | 1.39  | 1  | SNT | 7.20  |
| 6WJC_4N4W_ASD01810699 | 2 | 0.021 | 0.81  | 5  | SNT | 3.19  |
| 6WJC_4N4W_ASD01811561 | 6 | 1.017 | 0.96  | 7  | SNT | 3.13  |

<sup>a</sup> "Daughter"\_"Parent"\_Ligand: "Daughter" and "Parent" structures given as PDB IDs, Ligand as ASD ID

<sup>b</sup> Pose ID of the docked ligand that was closest to the hot spot

<sup>c</sup> Hot spot ID and the number of probe clusters. E.g. 0.021 means the top hot spot (numbered as 0) with 21 probe clusters, see the FTMap paper.

<sup>d</sup> Shortest distance between the center of mass of the docked ligand and the hot spot

<sup>e</sup> Pose ID of the docked ligand that had the shortest distance to the allosteric modulator copied from the "parent" protein

<sup>f</sup> 3-letter PDB code of the ligand in the "parent" structure

<sup>g</sup> Distance between the center of mass of the docked ligand and the center of mass of the ligand from the "parent" structure.

**Table S7. Number of structures with conserved sites, grouped by conformational state, for 'parent' structures listed in Table 1.**

| Parent <sup>a</sup> |                   |       |              | Daughter |              |          |       |
|---------------------|-------------------|-------|--------------|----------|--------------|----------|-------|
| PDB                 | Target            | Class | State        | Active   | Intermediate | Inactive | Other |
| 5UIG                | A <sub>2A</sub>   | A     | Inactive     | 73       | 16           | 192      | 1     |
| 5X7D                | β <sub>2</sub>    | A     | Inactive     |          |              | 33       |       |
| 5T1A                | CCR2              | A     | Inactive     |          |              | 19       |       |
| 4MBS                | CCR5              | A     | Inactive     | 81       | 18           | 219      | 1     |
| 6QZH                | CCR7              | A     | Inactive     | 1        |              | 9        |       |
| 5LWE                | CCR9              | A     | Inactive     | 2        |              | 44       |       |
| 3ODU                | CXCR4             | A     | Inactive     | 40       | 12           | 179      | 1     |
| 3OE0                | CXCR4             | A     | Inactive     | 81       | 20           | 218      | 1     |
| 4PHU                | FFA1              | A     | Intermediate | 1        | 2            | 9        |       |
| 5KW2                | FFA1              | A     | Intermediate | 18       | 7            | 21       |       |
| 5TZR                | FFA1              | A     | Intermediate | 1        | 2            | 9        | 1     |
| 5TZY                | FFA1              | A     | Intermediate | 17       | 8            | 23       |       |
| 6LI0                | GPR52             | A     | Inactive     | 26       | 8            | 59       | 1     |
| 4MQT                | M <sub>2</sub>    | A     | Active       | 28       | 15           | 83       |       |
| 5NDD                | PAR2              | A     | Intermediate | 36       | 12           | 140      | 1     |
| 5NDZ                | PAR2              | A     | Intermediate |          | 1            |          |       |
| 4K5Y                | CRF <sub>1</sub>  | B     | Inactive     | 1        | 1            | 3        |       |
| 4OR2                | mGlu <sub>1</sub> | C     | Inactive     | 35       | 12           | 143      |       |
| 4OO9                | mGlu <sub>5</sub> | C     | Inactive     | 39       | 5            | 100      | 1     |
| 4N4W                | SMO               | F     | Inactive     | 56       | 12           | 126      | 1     |
| 5L7I                | SMO               | F     | Inactive     | 9        | 7            | 32       |       |
| All structures      |                   |       |              | 88       | 34           | 271      | 1     |

<sup>a</sup> Parent structures with weakly detected, or protein-membrane interfacial sites were left out of this analysis (one active-state, one intermediate and 16 inactive-state structures).
